# Supplementary material
Source: HighWire-hosted journal article supplement (doi:10.1101/rna.077537.120)
Supplement: Supplemental_Material_.pdf [file Supplemental_Material_.pdf]

# **Comparative patterns of modified nucleotides in individual tRNA species from a mesophilic and two thermophilic archaea**

**Philippe Wolff<sup>1\*</sup>, Claire Villette<sup>2</sup>, Julie Zumsteg<sup>2</sup>, Dimitri Heintz<sup>2</sup>, Laura Antoine<sup>1</sup>, Béatrice Chane-Woon-Ming<sup>1</sup>, Louis Droogmans<sup>3</sup>, Henri Grosjean<sup>3</sup>, Eric Westhof<sup>1\*</sup>**

<sup>1</sup> Architecture et Réactivité de l'ARN, Institut de Biologie Moléculaire et Cellulaire du CNRS, Université de Strasbourg, F-67084, Strasbourg, France

<sup>2</sup> Institut de Biologie Moléculaire des Plantes du CNRS, Université de Strasbourg, F-67084, Strasbourg, France

<sup>3</sup> Laboratoire de Chimie Biologique, Université Libre de Bruxelles, Institut Labiris, Avenue Emile Gryzom 1, B-1070, Belgium

## **SUPPLEMENTAL MATERIAL**

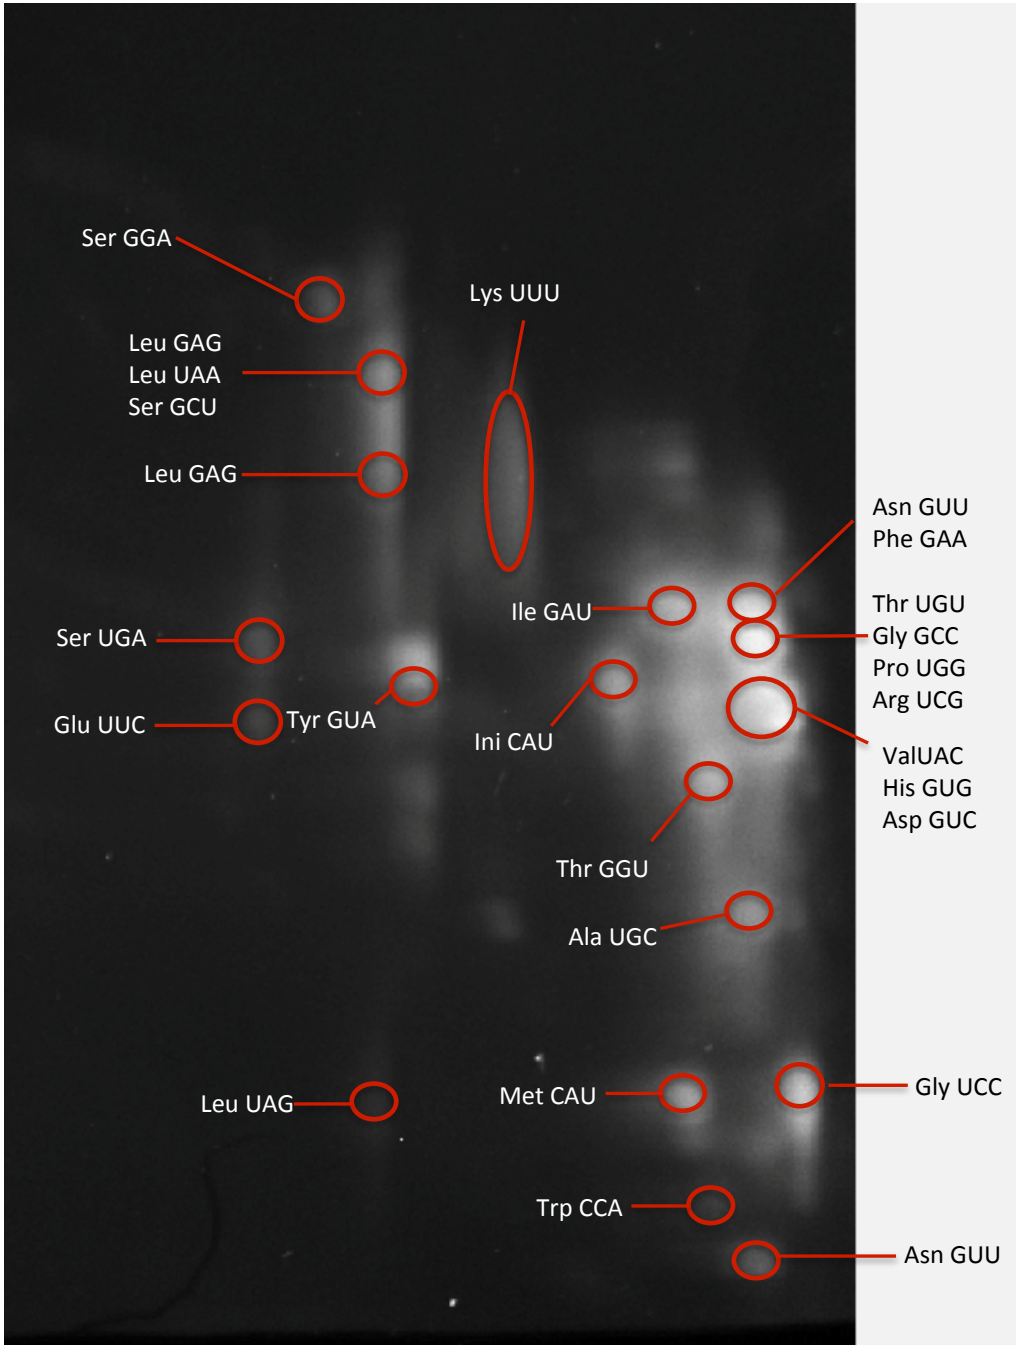

A

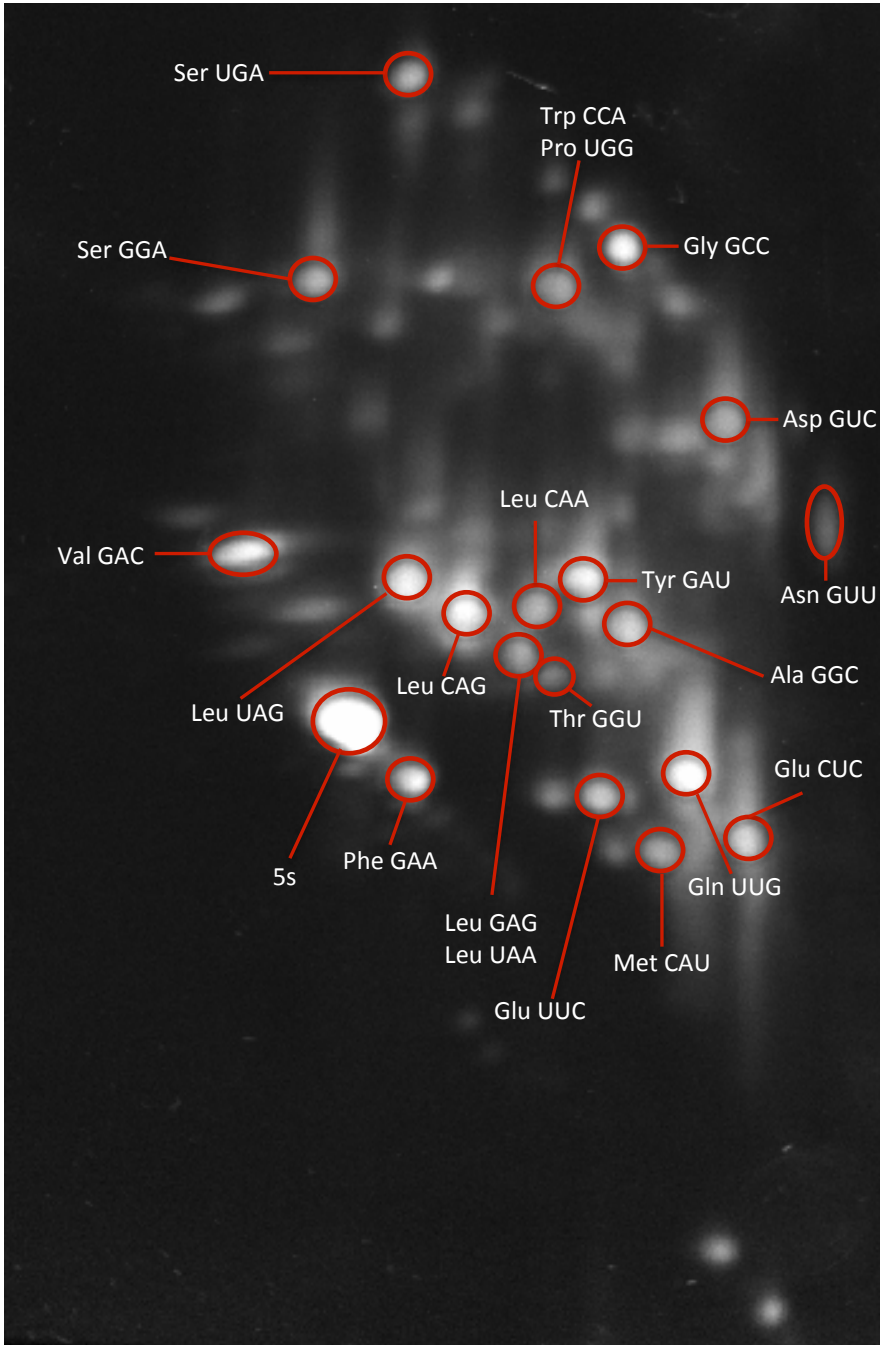

**B**

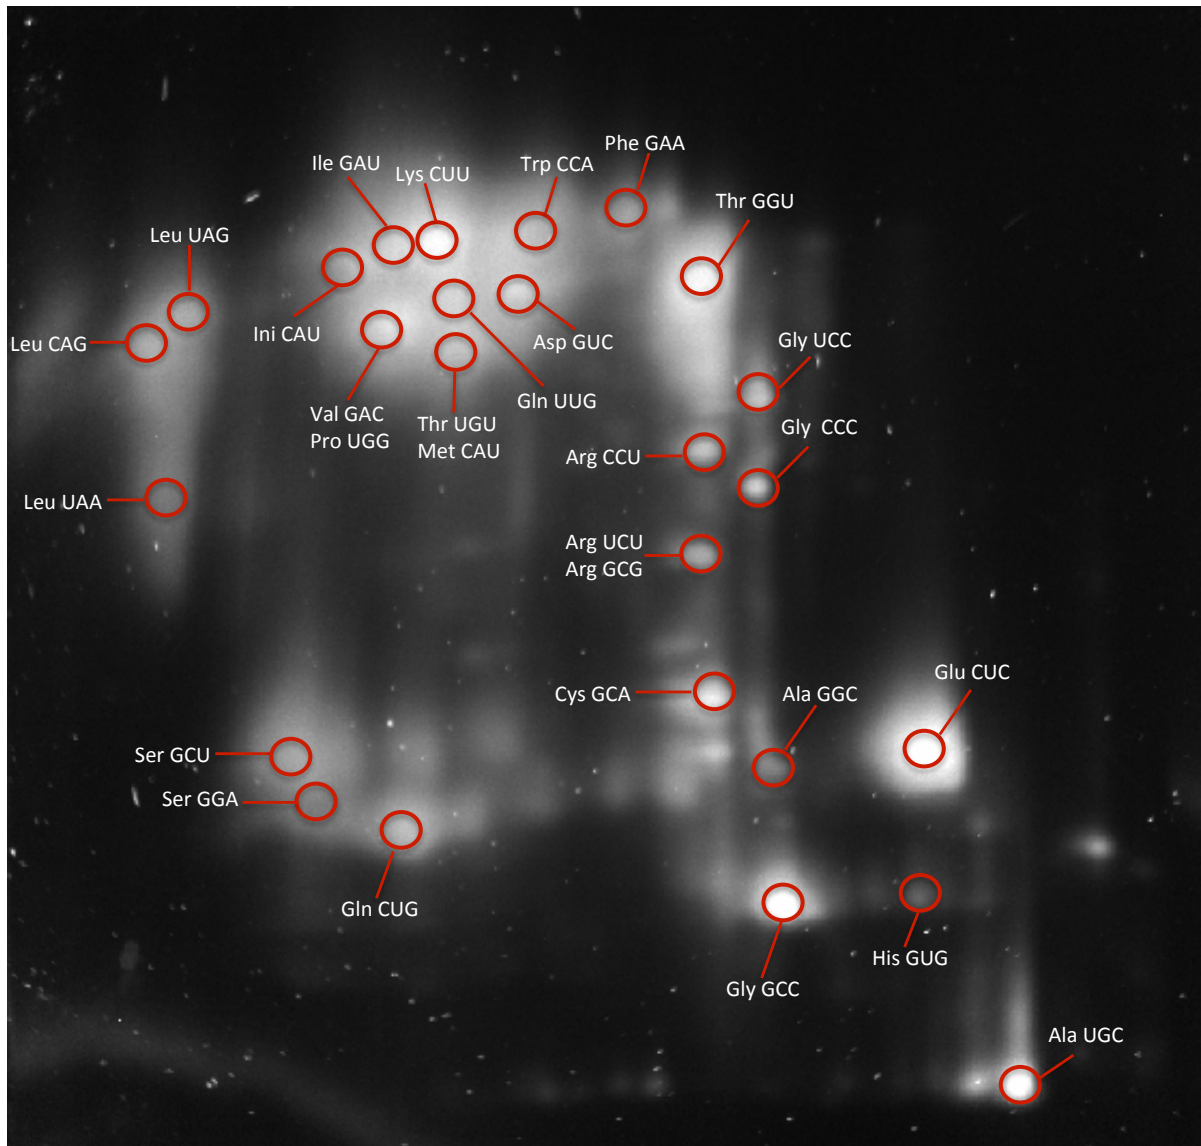

C

### Figure S1

20% 2D polyacrylamide gel of total tRNAs. The spots containing tRNAs that were identified by MS/MS sequencing are circled in red. A) *M. maripaludis*; B) *S. acidocaldarius*; C) *P. furiosus*.

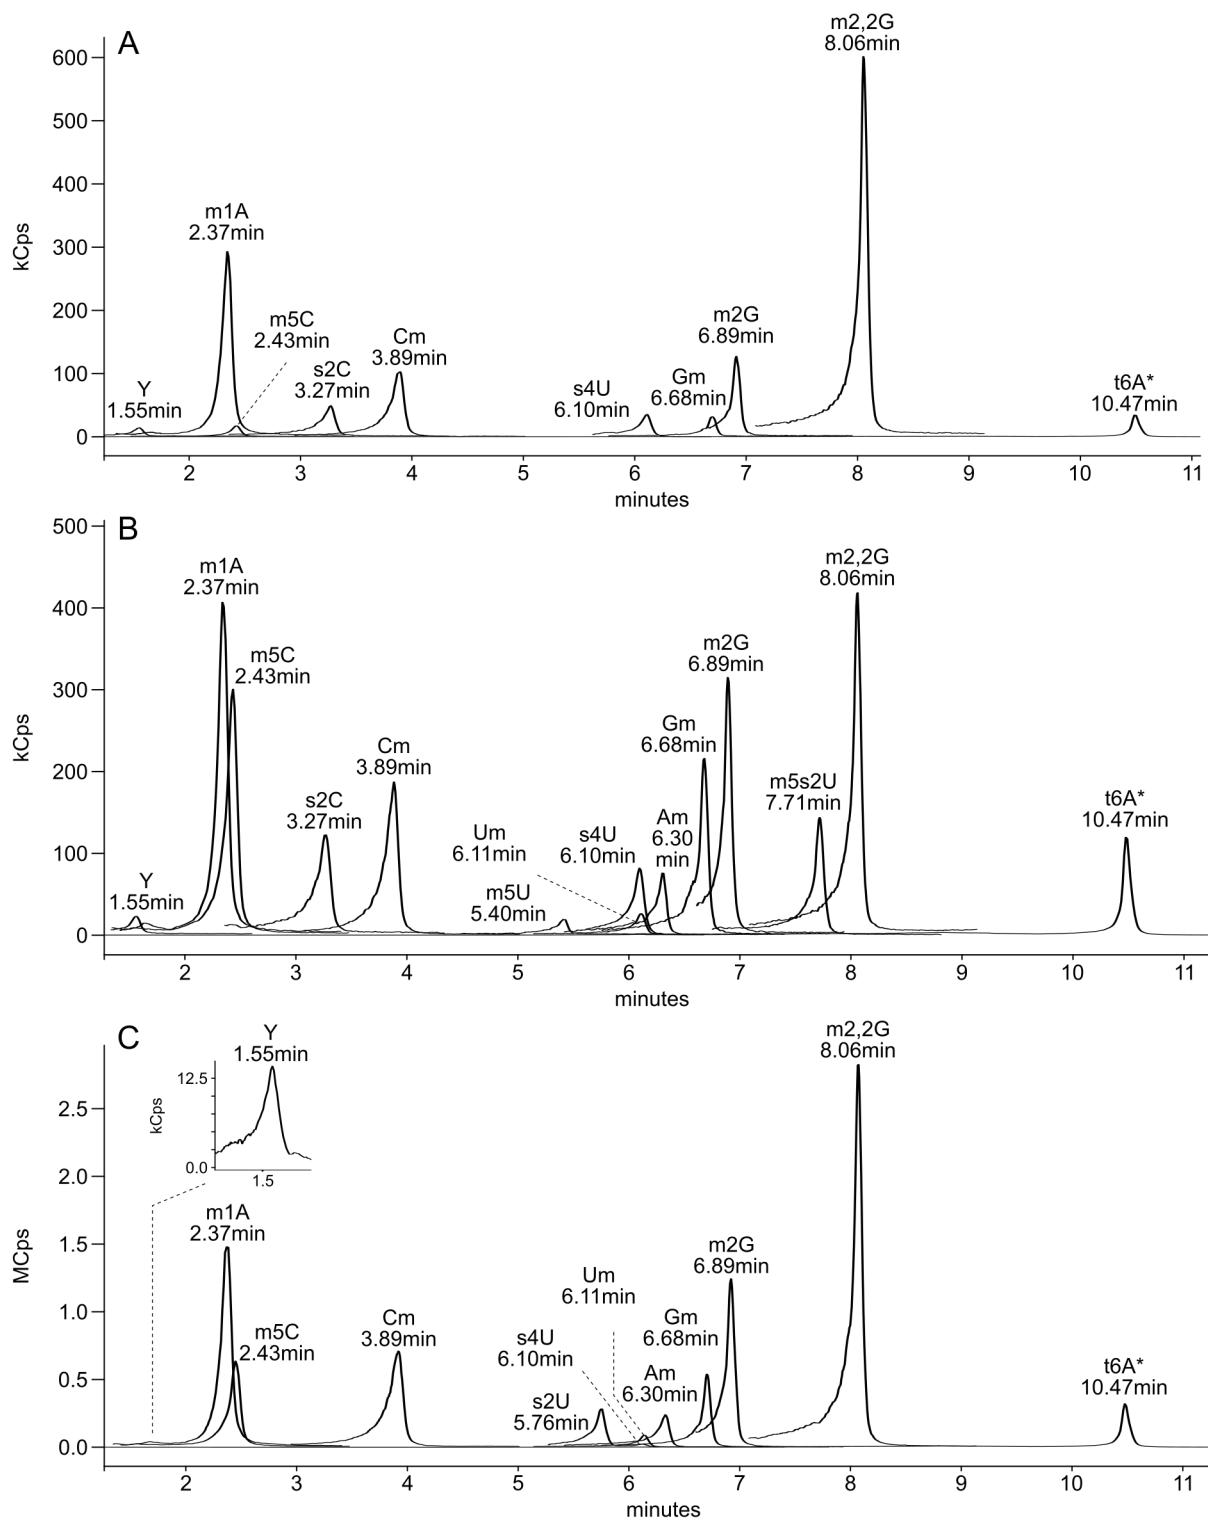

**Figure S2**

Extracted ions chromatograms for the following 15 nucleosides: m<sup>1</sup>A, m<sup>2</sup>G, Am, Cm, Gm, Um, s<sup>2</sup>C, s<sup>2</sup>U, s<sup>4</sup>U, m<sup>5</sup>s<sup>2</sup>U, m<sup>5</sup>C, m<sup>5</sup>U, m<sup>2</sup><sub>2</sub>G, Y and t<sup>6</sup>A. (\*) For t<sup>6</sup>A, the modifications are analyzed by following only the precursor m/z 413 and the product m/z 281. A) *M. maripaludis*; B) *P. furiosus*; C) *S. acidocaldarius*. Notice that the relative amount of pseudouridine (Y) in *S. acidocaldarius* is remarkably low compared to *M. maripaludis* and *P. furiosus*. Also, m<sup>5</sup>s<sup>2</sup>U is absent in the profile of *S. acidocaldarius* compared to *P. furiosus*.

a)

|                          | m1A      | m2G      | Am       | Cm       | Gm       | Um       | s2C      | s2U      | s4U      | m5s2U    | m5C      | m5U      | m2,2G    | Y        |
|--------------------------|----------|----------|----------|----------|----------|----------|----------|----------|----------|----------|----------|----------|----------|----------|
| <i>M. maripaludis</i>    | 1,20E+06 | 4,97E+05 | 0,00E+00 | 2,60E+05 | 1,28E+05 | 0,00E+00 | 1,41E+05 | 0,00E+00 | 1,23E+05 | 0,00E+00 | 7,98E+04 | 0,00E+00 | 2,39E+06 | 3,26E+04 |
|                          | 1,21E+06 | 4,83E+05 | 0,00E+00 | 2,85E+05 | 1,27E+05 | 0,00E+00 | 1,39E+05 | 0,00E+00 | 1,38E+05 | 0,00E+00 | 8,44E+04 | 0,00E+00 | 2,53E+06 | 3,28E+04 |
|                          | 1,53E+06 | 5,65E+05 | 0,00E+00 | 4,63E+05 | 1,43E+05 | 0,00E+00 | 2,13E+05 | 0,00E+00 | 1,76E+05 | 0,00E+00 | 8,70E+04 | 0,00E+00 | 2,87E+06 | 3,21E+04 |
| standard deviation       | 1,85E+05 | 4,37E+04 | 0,00E+00 | 1,10E+05 | 8,64E+03 | 0,00E+00 | 4,19E+04 | 0,00E+00 | 2,75E+04 | 0,00E+00 | 3,61E+03 | 0,00E+00 | 2,47E+05 | 3,83E+02 |
| <i>P. furiosus</i>       | 2,07E+06 | 1,35E+06 | 3,89E+05 | 6,48E+05 | 9,33E+05 | 1,29E+05 | 5,00E+05 | 0,00E+00 | 3,58E+05 | 6,64E+05 | 1,69E+06 | 7,52E+04 | 1,91E+06 | 6,01E+04 |
|                          | 1,82E+06 | 1,23E+06 | 3,63E+05 | 5,76E+05 | 8,44E+05 | 1,18E+05 | 3,70E+05 | 0,00E+00 | 3,28E+05 | 5,76E+05 | 1,52E+06 | 6,92E+04 | 1,85E+06 | 5,66E+04 |
|                          | 2,06E+06 | 1,19E+06 | 3,54E+05 | 5,78E+05 | 8,23E+05 | 1,26E+05 | 4,17E+05 | 0,00E+00 | 3,21E+05 | 6,11E+05 | 1,62E+06 | 6,63E+04 | 1,89E+06 | 5,88E+04 |
| standard deviation       | 1,44E+05 | 8,17E+04 | 1,81E+04 | 4,10E+04 | 5,85E+04 | 5,63E+03 | 6,54E+04 | 0,00E+00 | 1,95E+04 | 4,40E+04 | 8,84E+04 | 4,55E+03 | 3,12E+04 | 1,76E+03 |
| <i>S. acidocaldarius</i> | 5,65E+06 | 4,90E+06 | 1,05E+06 | 1,79E+06 | 1,79E+06 | 3,36E+05 | 0,00E+00 | 9,59E+05 | 3,18E+04 | 0,00E+00 | 2,77E+06 | 0,00E+00 | 1,12E+07 | 3,98E+04 |
|                          | 5,58E+06 | 4,86E+06 | 1,06E+06 | 1,97E+06 | 1,90E+06 | 3,70E+05 | 0,00E+00 | 1,01E+06 | 3,11E+04 | 0,00E+00 | 2,83E+06 | 0,00E+00 | 1,09E+07 | 3,88E+04 |
|                          | 6,89E+06 | 6,08E+06 | 1,07E+06 | 1,92E+06 | 1,77E+06 | 3,40E+05 | 0,00E+00 | 1,04E+06 | 3,23E+04 | 0,00E+00 | 2,99E+06 | 0,00E+00 | 1,12E+07 | 3,79E+04 |
| standard deviation       | 7,39E+05 | 6,94E+05 | 9,61E+03 | 9,43E+04 | 7,23E+04 | 1,87E+04 | 0,00E+00 | 3,84E+04 | 5,97E+02 | 0,00E+00 | 1,15E+05 | 0,00E+00 | 1,57E+05 | 9,34E+02 |

b)

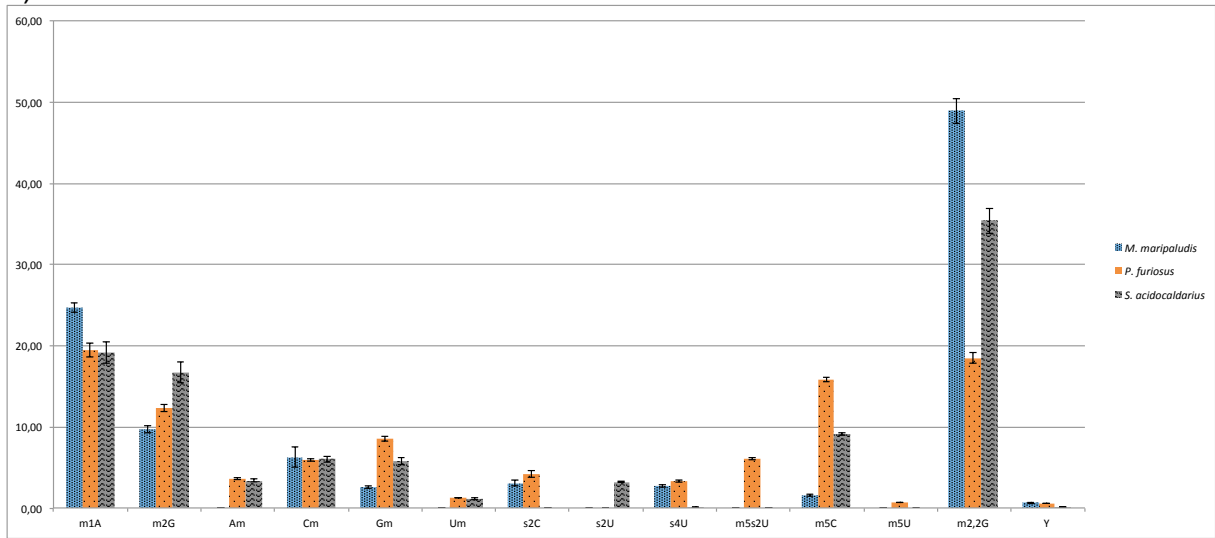

**Figure S3**

Relative quantification of nucleosides by MRM (multiple reaction monitoring). a) Table of area of nucleosides for each species. The analysis was performed with three technical replicates. b) Relative quantification histogram of nucleoside MRM analysis. Values are normalized by using the sum of area per nucleoside for each archaeon (light blue *M. maripaludis*, orange for *P. furiosus*, and grey for *S. acidocaldarius*).

A

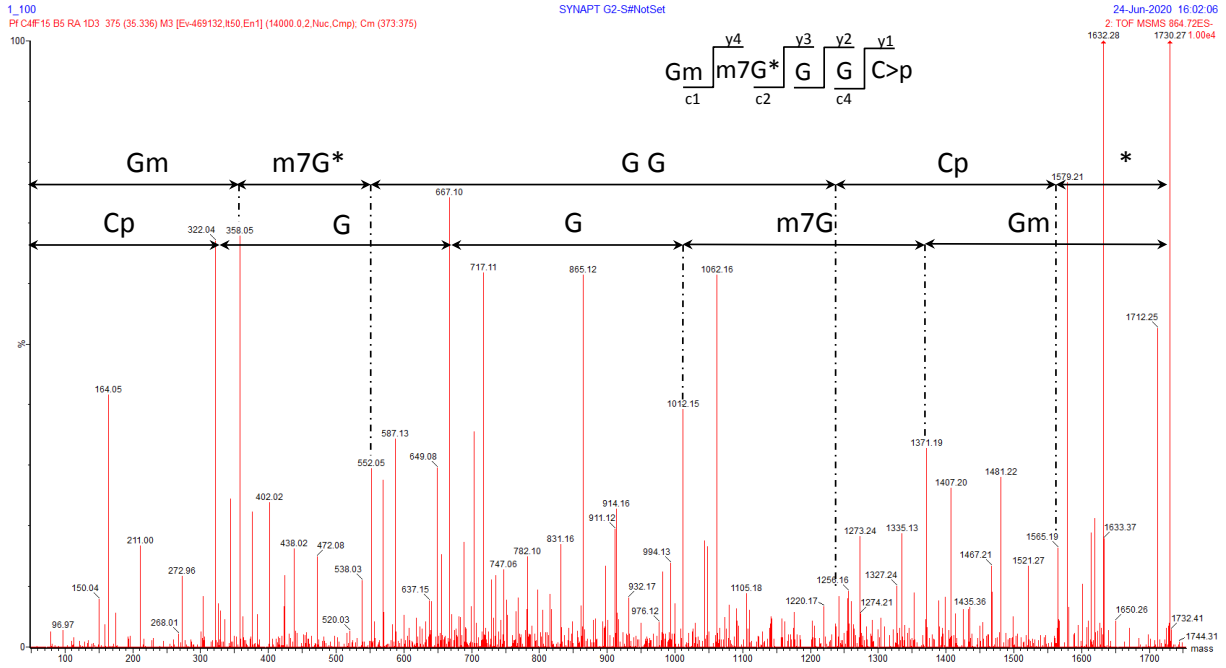

B

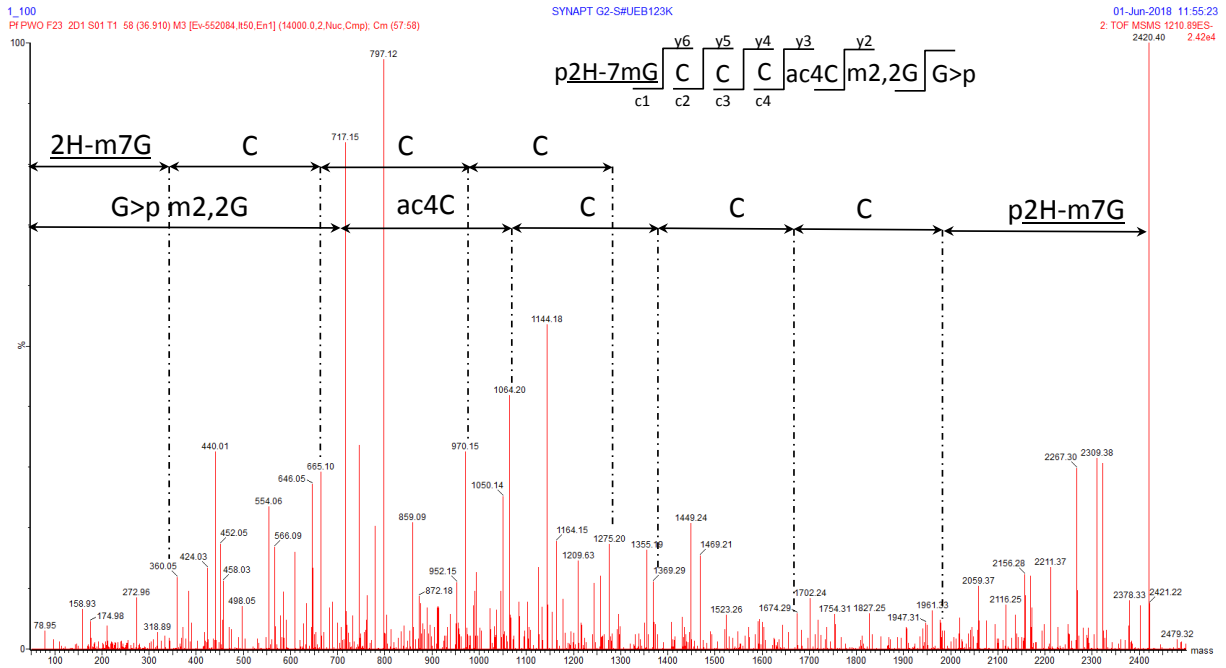

C

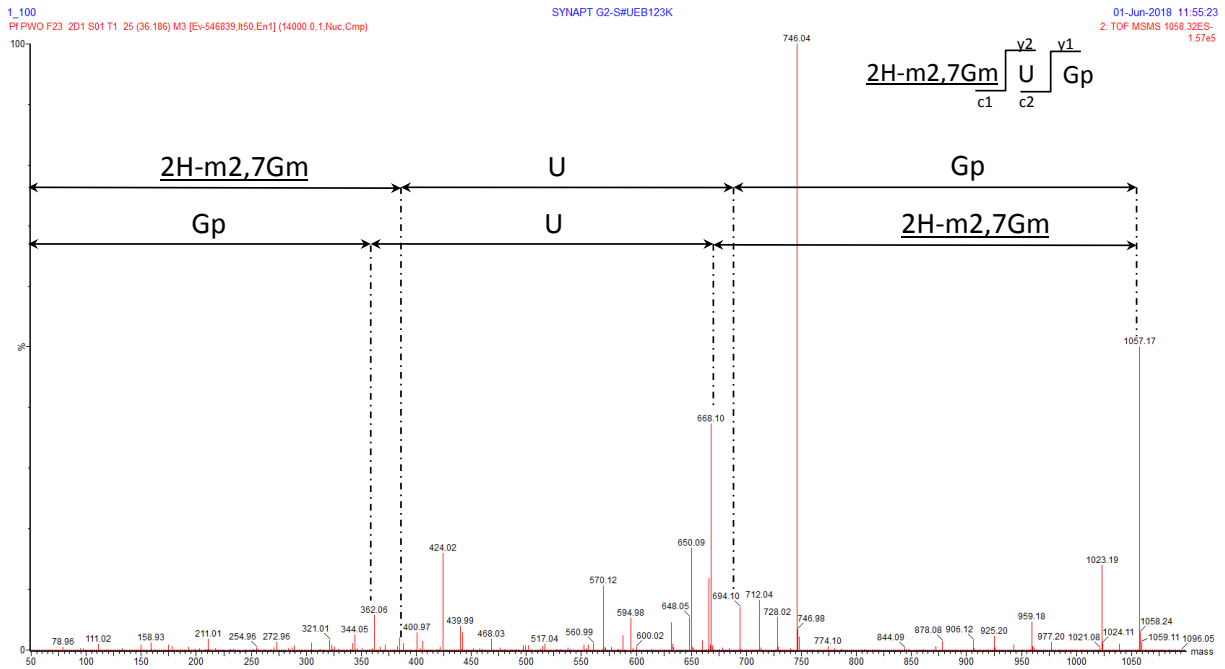

D

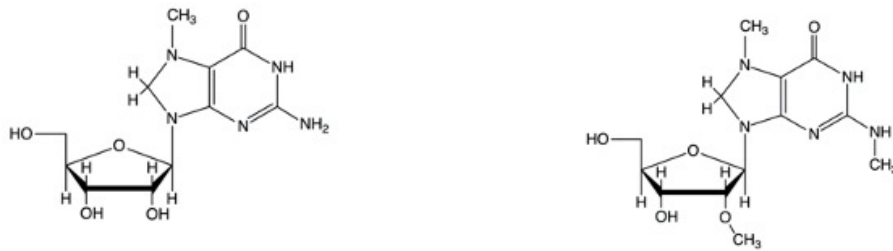

Figure S4

MS/MS sequencing spectra containing m<sup>7</sup>G. A) MS/MS spectrum [Gm][m<sup>7</sup>G]GGC>p of tRNA<sup>ini</sup> of *P. furiosus* after RNase A digestion (m/z 864.63, z = 2-). The spectrum shows a neutral loss of 165 Da, which is specific to m<sup>7</sup>G and corresponding to the loss of the positively charged modified base. The mass of m<sup>7</sup>G nucleotide is 359 Da. B) MS/MS spectrum p[2H-m<sup>7</sup>G]CCC[ac4C]G>p of tRNA<sup>Glu</sup> of *P. furiosus* after RNase T1 digestion (m/z 1209.66, z = 2-). The mass of m<sup>7</sup>G nucleotide is 361 Da which could correspond to the reduced form of m<sup>7</sup>G (Wintermeyer and Zachau 1975). C) MS/MS spectrum [2H-m<sup>2</sup>,7Gm]UGp of tRNA<sup>Glu</sup> of *P. furiosus* after RNase T1 digestion (m/z 1057.17, z = 1-). The mass of 2H-m<sup>2</sup>,7Gm nucleotide is

389 Da which could correspond to the reduced form of m<sup>2</sup>-Gm. 2H-m<sup>7</sup>G and 2H-m<sup>2,7</sup>Gm are underlined because they cannot be unambiguously characterized by the techniques used and unknown modified guanosine nucleotides cannot be excluded. D) The chemical structures of the reduced forms of m<sup>7</sup>G derivatives.

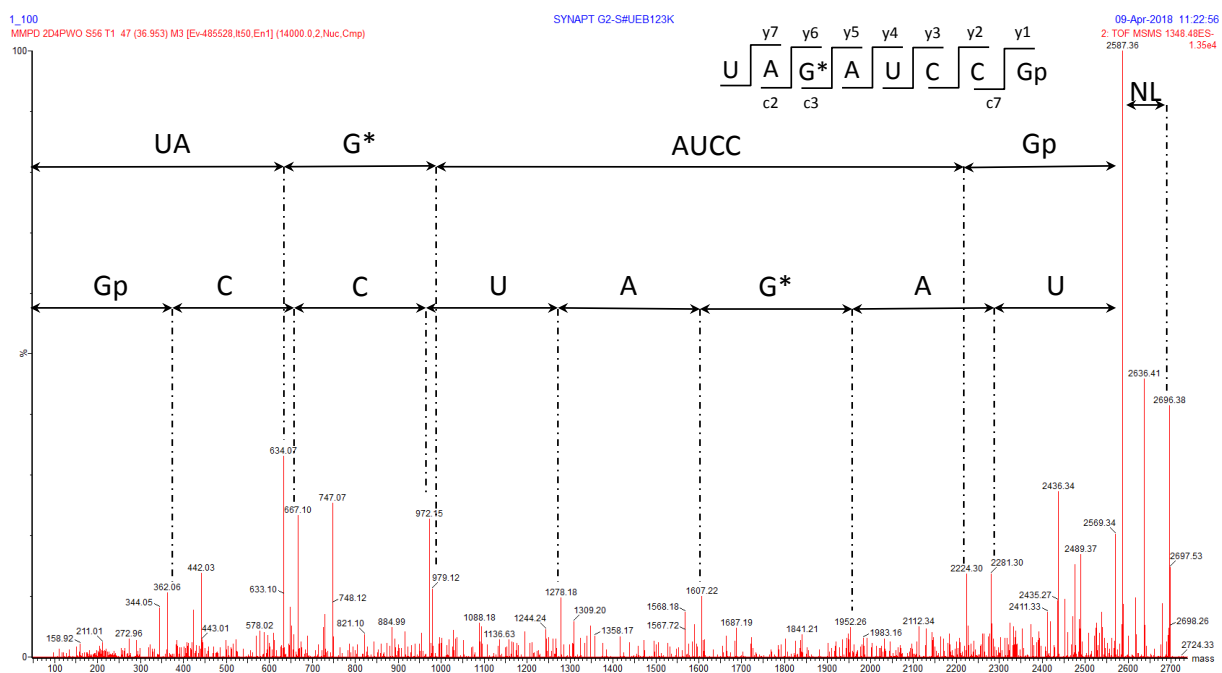

**Figure S5**

MS/MS sequencing spectrum UA[xG]AUCCGp of tRNA<sup>Tyr</sup> of *M. maripaludis* after RNase T1 digestion (m/z 1347.71, z = 2-). The spectrum shows a neutral loss of 109 Da corresponding to the loss of an unknown modification from G37. The mass of xG nucleotide is 454 Da. \* corresponds to the probable location of the neutral loss.

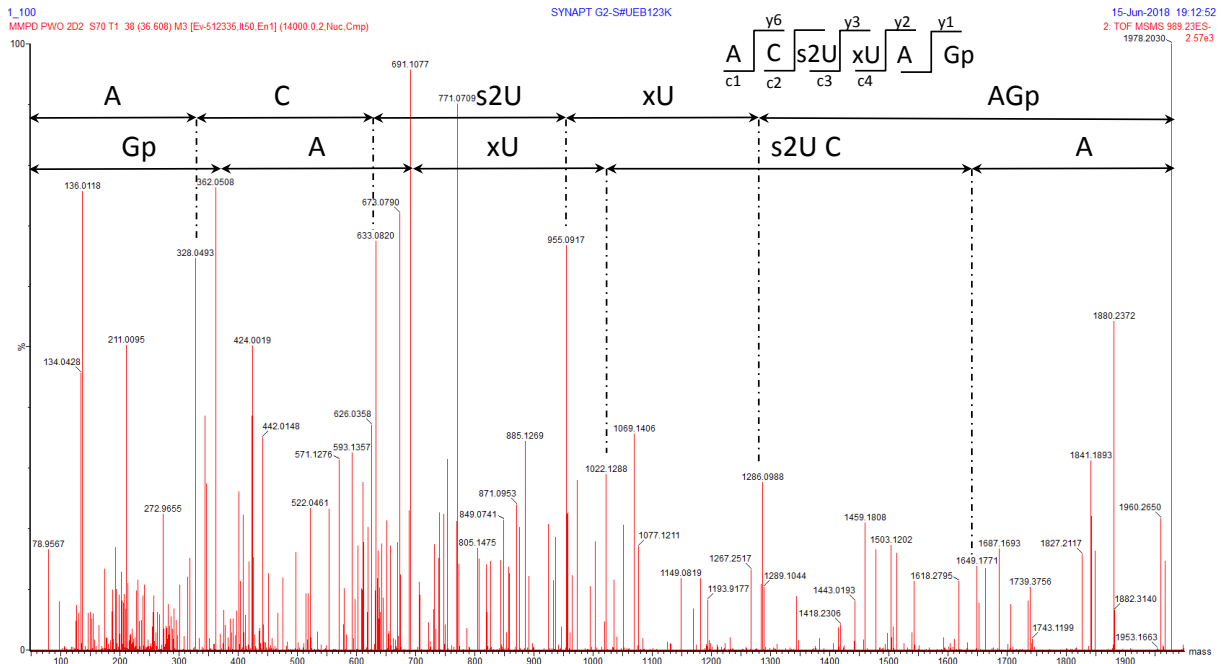

**Figure S6**

MS/MS sequencing spectrum AC[s<sup>2</sup>U][xU]AGp of tRNA<sup>Leu</sup> of *M. maripaludis* after RNase T1 digestion (m/z 988.61, z = 2-). The mass of xU nucleotide is 331 Da.

A

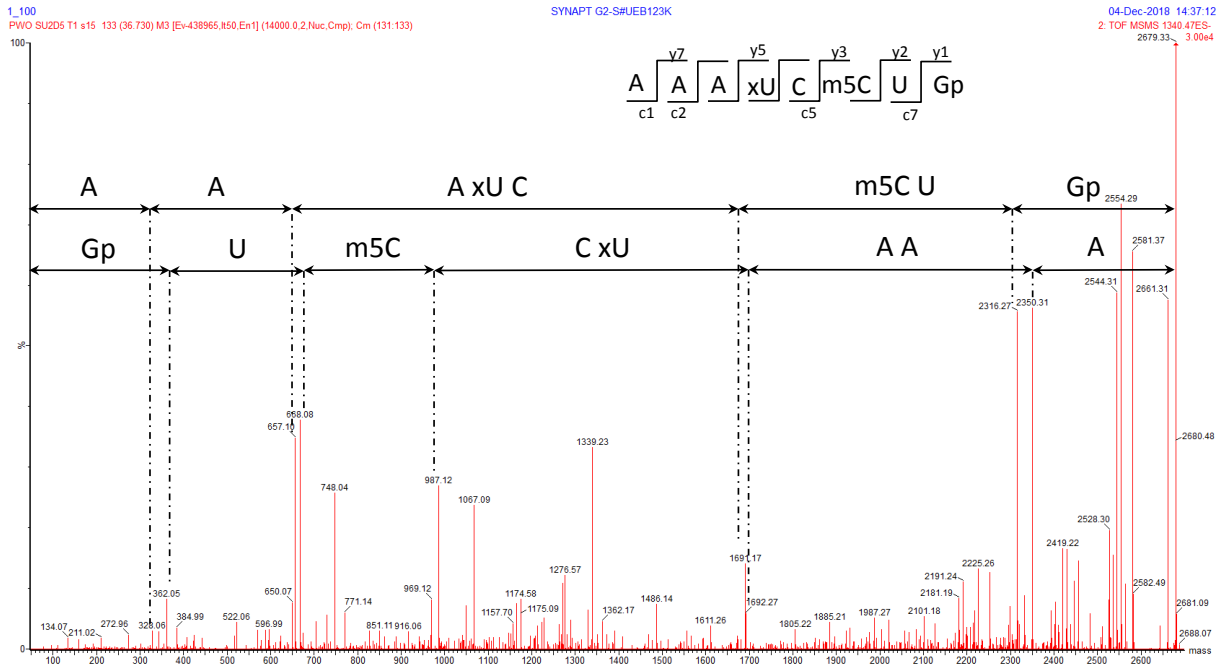

B

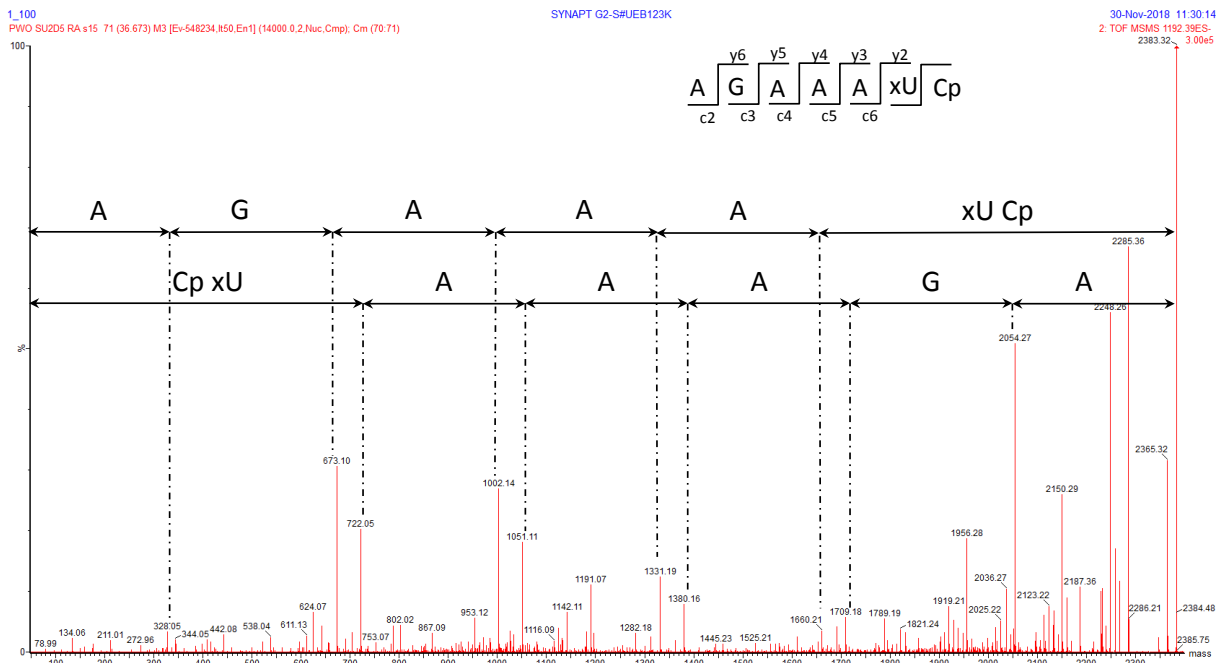

C

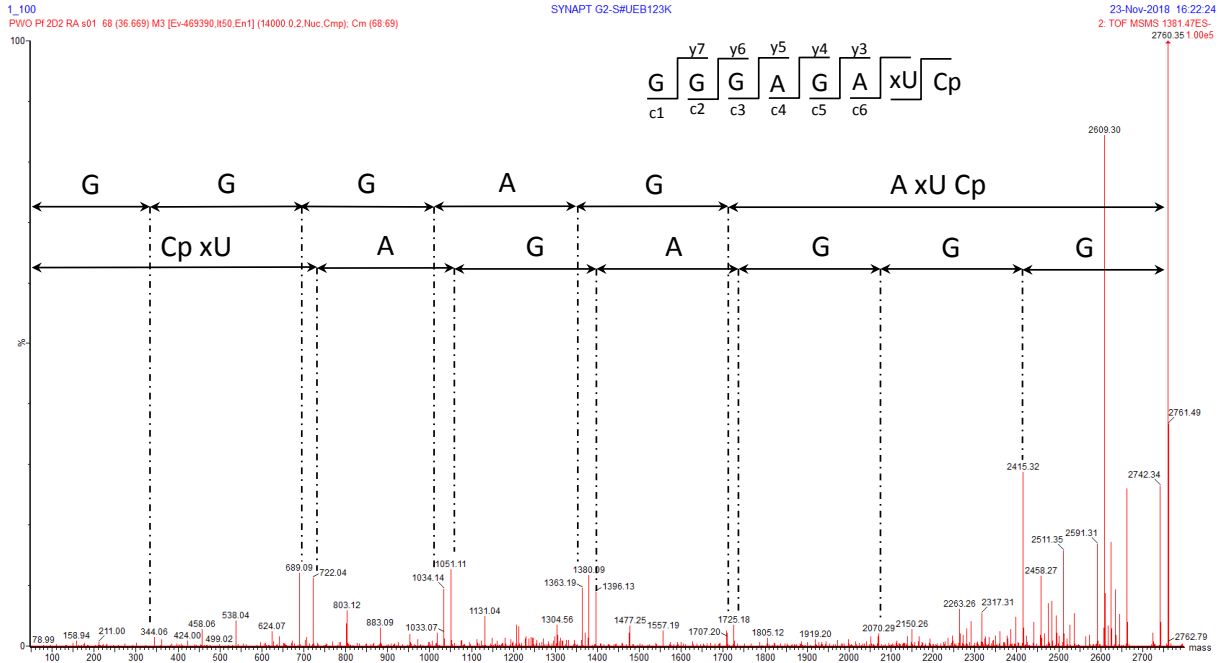

**Figure S7**

MS/MS sequencing spectra containing xU47 (nucleotide mass of 400 Da). A) MS/MS sequencing spectrum AAA[xU]C[m5C]UGp of tRNA<sup>Val</sup> of *S. acidocaldarius* after RNase T1 digestion (m/z 1339.17, z = 2-). B) MS/MS sequencing spectrum AGAAA[xU]Cp of tRNA<sup>Val</sup> of *S. acidocaldarius* after RNase A digestion (m/z 1191.14, z = 2-). C) MS/MS sequencing spectrum GGGAGA[xU]Cp of tRNA<sup>Met</sup> of *P. furiosus* after RNase A digestion (m/z 1379.67, z = 2-).

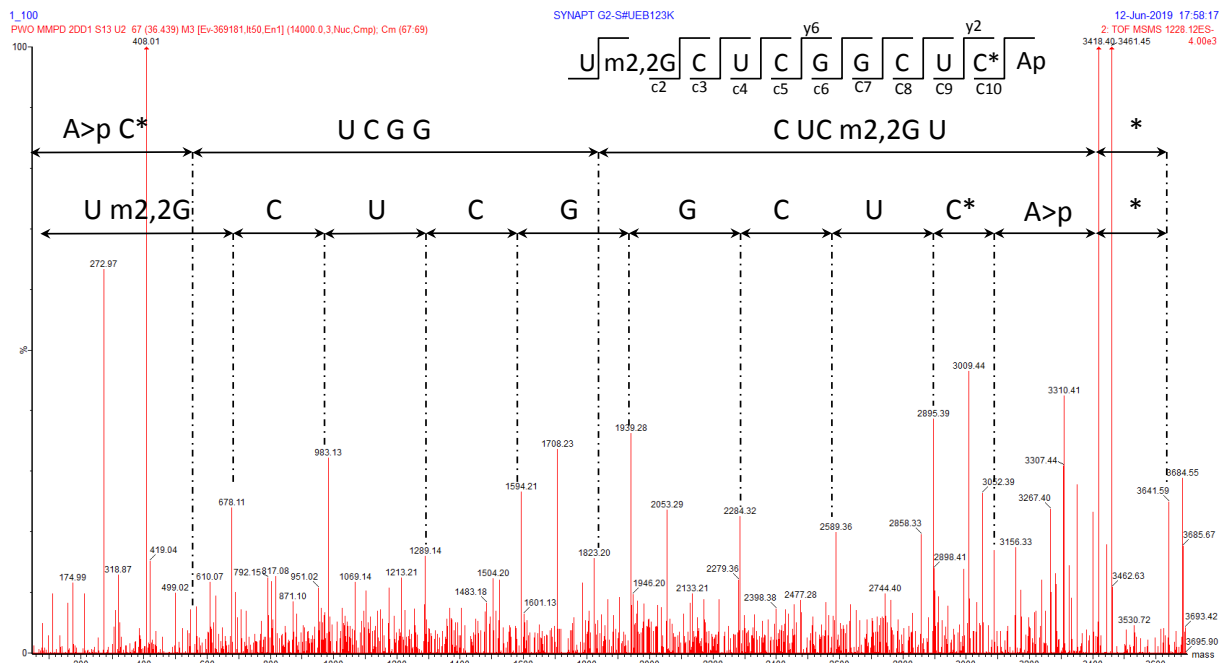

**Figure S8**

MS/MS sequencing spectrum U[m<sup>2</sup>Gm]CUCGGCU[C+>A>p of tRNA<sup>Ile</sup> of *M. maripaludis* after RNase U2 digestion (m/z 1227.51, z = 3-). The spectrum shows a neutral loss of 223 Da, which corresponds to the loss of the modification from the cytosine base.

A

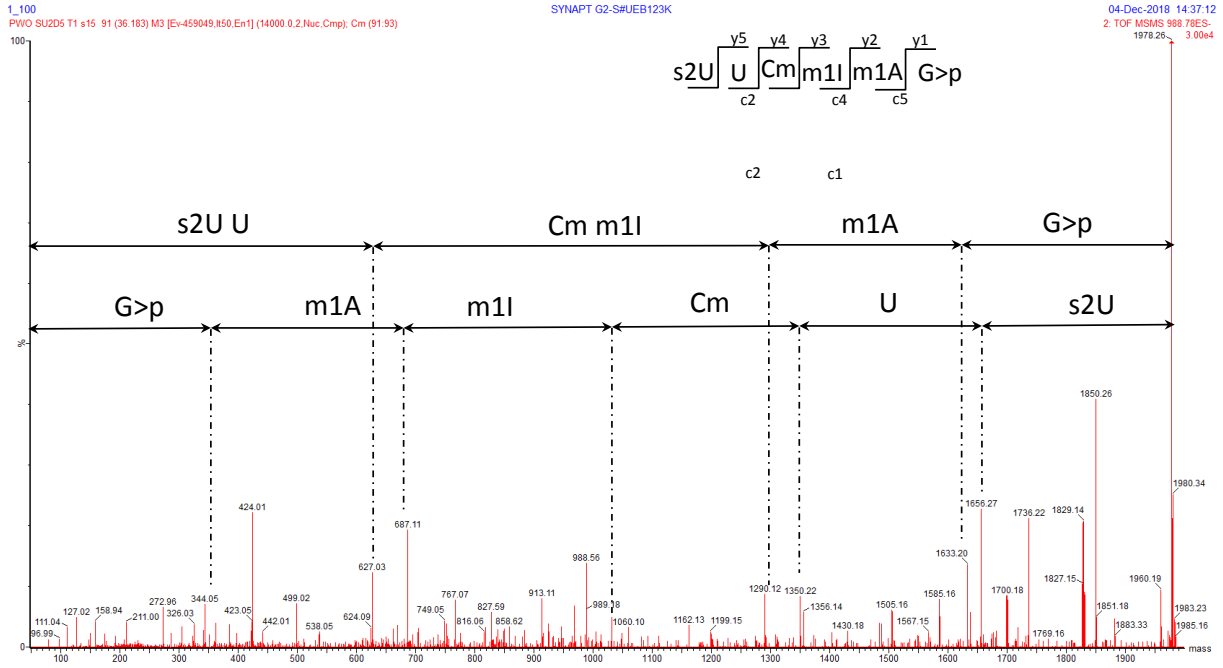

B

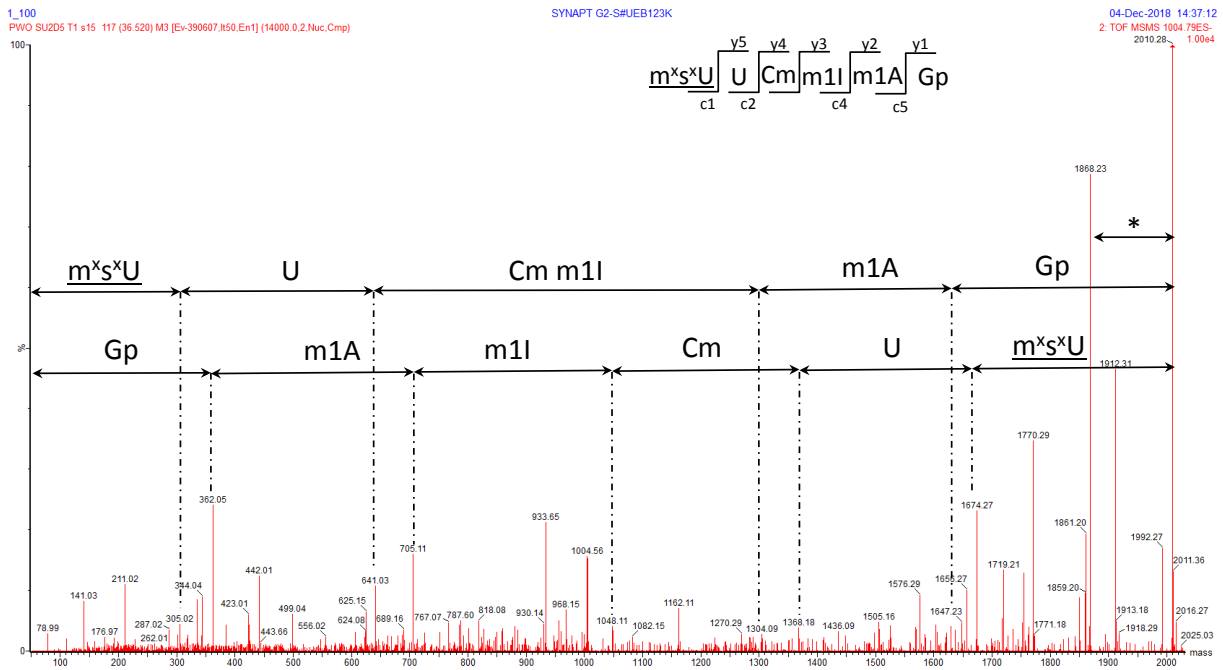

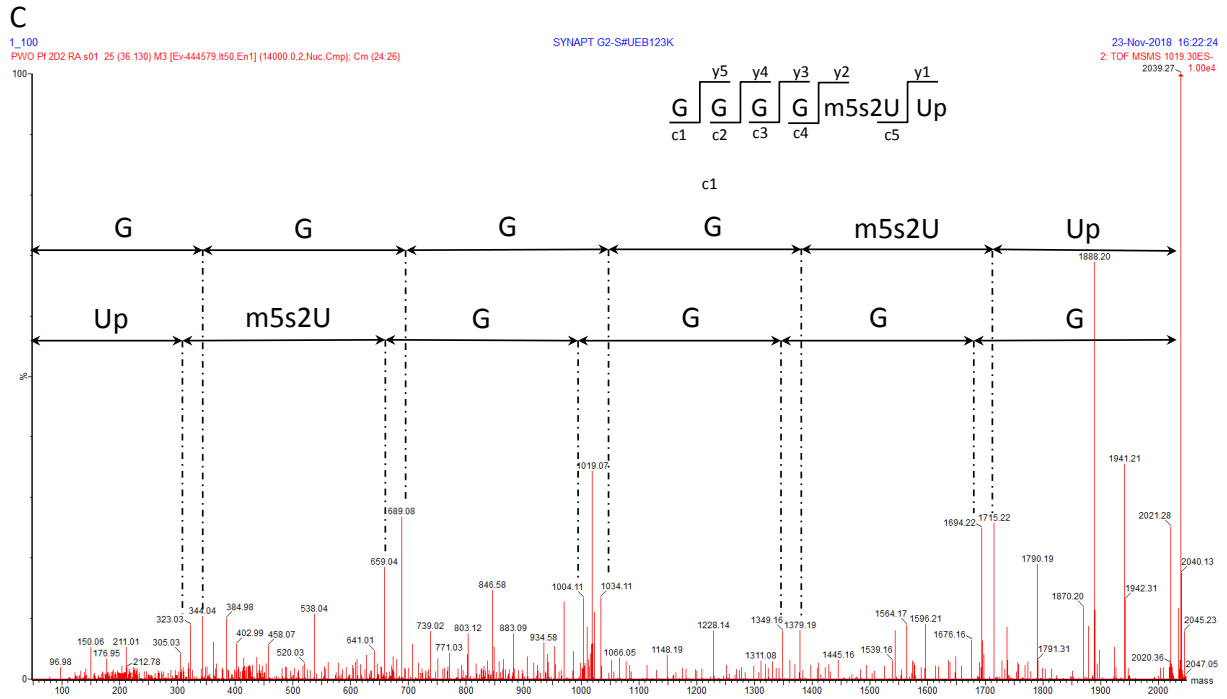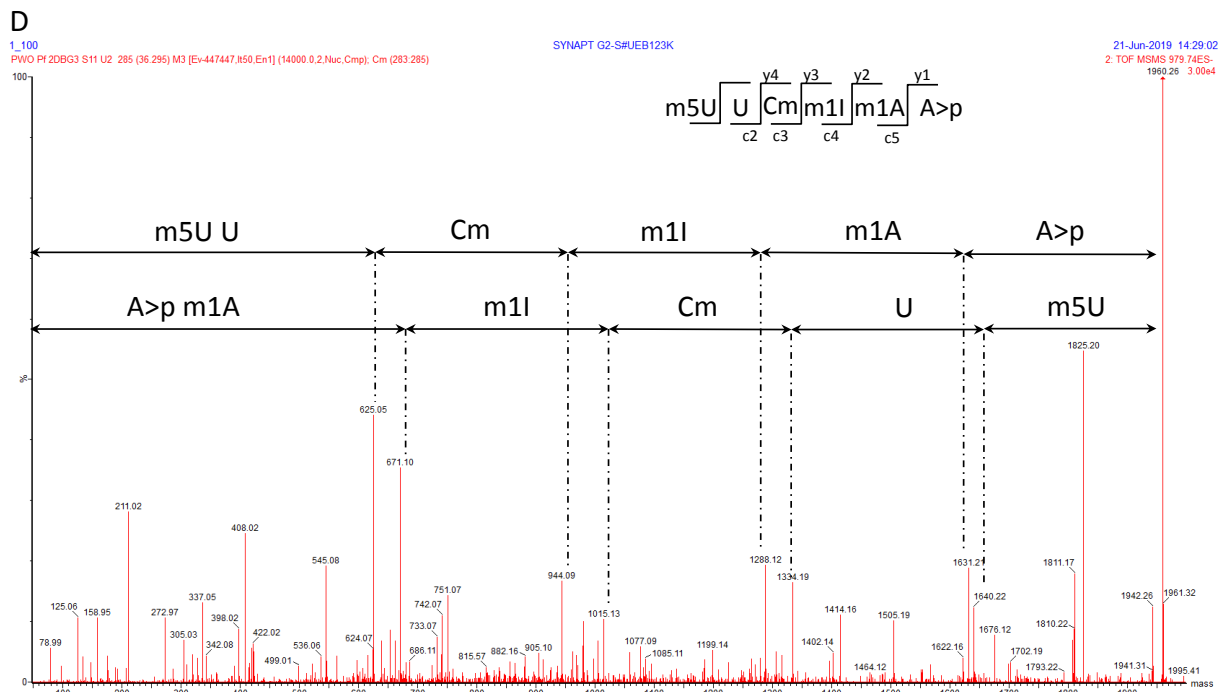

**Figure S9**

MS/MS sequencing spectra containing U54. A) MS/MS spectrum  $[s^2U]U[Cm][m^1I][m^1A]G>p$  of tRNA<sup>Val</sup> of *S. acidocaldarius* after RNase T1 digestion ( $m/z$  988.62,  $z = 2^-$ ). B) MS/MS spectrum  $[s^x m^x U]U[Cm][m^1I][m^1A]Gp$  of tRNA<sup>Val</sup> of *S. acidocaldarius* after RNase T1 digestion ( $m/z$  1004.65,  $z = 2^-$ ). The spectrum shows a neutral loss of 142 Da, which corresponds to the loss of a methyl-thio uracil (or pseudouracil) base.  $[s^x m^x U]$  is underlined because the position

of methyl and thio groups are unambiguously localized. C) MS/MS spectrum GGGG[m<sup>5</sup>s<sup>2</sup>U]Up of tRNA<sup>Met</sup> of *P. furiosus* after RNase A digestion (m/z 1019.12, z = 2-). D) MS/MS sequencing spectrum [m<sup>5</sup>U]U[Cm][m<sup>1</sup>I][m<sup>1</sup>A]A>p of tRNA<sup>Lys</sup> of *P. furiosus* after RNase A digestion (m/z 979.63, z = 2-).

*Methanococcus marisplacidis*

| AA AC  | Acc-5'    | D-5'    | D-loop    | D-3'         | AC-5'    | Ac-loop      | AC-3'         | V-region       | E-5'    | T-loop | E-3'    | Acc-3' |         |
|--------|-----------|---------|-----------|--------------|----------|--------------|---------------|----------------|---------|--------|---------|--------|---------|
| 1      | 8         | 1       | 1         | 2            | 2        | 3            | 3             | 4              | 4       | 5      | 6       | 6      |         |
| 1      | 0         | 4       | 4         | 2            | 2        | 2            | 3             | 4              | 4       | 4      | 6       | 6      |         |
| H_GHG  | GCCGGGG   | UA GGGG | AG U      | GGCU A UCCU  | G AGGGA  | CU GUG       | m1G A UCCU    | CGA            | C GGGG  | UUC    | G A     | UUCCGG | UCGCGG  |
| L_CAG  | GCAGGG    | UU UUGG | AG+ CCU   | GGUUA AGGG   | *G CAGGA | Cs2U XLAG    | A A UCCU      | UCCAGUAGGGU    | C GAGG  | UUC    | A A     | AUCCGG | CCCCGC  |
| L_CAG  | GCAGGG    | UU UUGG | AG+ CCU   | GGUUA AGGG   | *G CAGGA | CU GUC       | G G UCCG      | UCCAGUAGGGU    | C GAGG  | UUC    | G m1A   | AUCCGG | CCCCGC  |
| P_HSG  | GGGCGG    | UU GGGU | AG+ CCU   | GGUC A UCCU  | U UGGGA  | UU UGG       | m1G A UCCU    | AAA            | C CCGG  | UUC    | G m1A   | AUCCGG | CAGGCC  |
| A_HGC  | GGGCGG    | UA GGGU | AG+ UU    | GG A GAGG    | G CCGCC  | CU UMG[C/*C] | A A GGGG      | AGCU           | C GGGG  | m1YUcm | m1I m1A | AUCCGG | CUAGGU  |
| G_GCC  | GGGCGG    | UU AUGG | AG+ ACU   | GGU A UCAU   | A GCGCC  | CU GCC       | A C GGGG      | ACA            | C CCGG  | UUC    | A A     | AUCCGG | AGGCGG  |
| L_HGC  | GGGCGG    | UU GGGU | AG+ CCU   | GGU A UCAU   | U UUGG   | CU cmm5UCC   | A A GGGG      | UAA            | C GGGG  | m1YUcm | m1I m1A | AUCCGG | CAGCGG  |
| R_HGC  | GGGCGG    | UU GGGU | AG+ CCU   | GGUUA AGGG   | *G CAGGA | CU GUC       | A A UCCU      | UCCAGUAGGGU    | C GAGG  | UUC    | A A     | AUCCGG | CAGCGG  |
| R_HGC  | GGGCGG    | UU GGGU | AG+ CCU   | GGUUA AGGG   | *G CAGGA | CU GUC       | A A UCCU      | UCCAGUAGGGU    | C GAGG  | UUC    | A A     | AUCCGG | CAGCGG  |
| V_UAC  | GGACCU*AG | UU GGGU | AG+ UU    | GGCU A UGAC  | A UCGCC  | CU UAC       | A A GGGG      | GGU            | C GGGG  | UUC    | G A     | AUCCGG | UAGGUAC |
| V_GAC  | GAGUUCG   | UU GGGU | AG+ UU    | GGCU A UGAC  | A CCGCC  | CU GAC       | A C GGGG      | UGAU           | C GGGG  | UUC    | G m1A   | AUCCGG | CGGACU  |
| F_GAA  | GCCAGG    | UA GGUU | AG CCU    | GGG A GAGC   | *G CUGGA | CmU GAA      | img-14 A UCCG | UUGU           | C GGGG  | UUCm   | m1I m1A | AUCCGG | CCUUGG  |
| T_GAA  | GGGCGG    | UU GGGU | AG CCU    | GGUUA AGGG   | *G CAGGA | CU C+AU      | A A GGGG      | UCCAGUAGGGU    | C GAGG  | UUC    | A A     | AUCCGG | UCCCGC  |
| T_GAA  | GGGCGG    | UU GGGU | AG+ CCU   | GGUUA AGGG   | *G CAGGA | CU UGA       | A A UCCG      | UCCAGUAGGGU    | C GAGG  | m1YUcm | m1I m1A | AUCCGG | UCCCGC  |
| S_GGA  | GCAGGA    | UA GGUU | AG+ CCU   | GGG A AGGC   | *G UACCG | CU GGA       | A A UCCG      | UAGGCUUUGCCUCC | C GGGG  | UUC    | A A     | AUCCGG | UCCCGC  |
| V_GUA  | CCCGGA    | UA GGUU | AG+ CCU   | GGG A AGGC   | *G UACCG | CU GGA       | A A UCCG      | UAGGCUUUGCCUCC | C GGGG  | UUC    | A A     | AUCCGG | UCCCGC  |
| M_CAA  | GGGAGU    | UU GGGU | AG+ Ua2CU | GGUUA UCAU   | C GGGGA  | CU CCA       | A A UCCU      | GGA            | C UGGG  | UUC    | A A     | AUCCGG | UACUCC  |
| T_GAA  | AGGCGG    | UU GGUU | AG+ Cs2CU | GGUUA A GAGU | *G CUCGG | CU GAA       | hn6A A CCGG   | UUGU           | C GGGG  | UUCm   | G m1A   | AUCCGG | CUGCGG  |
| T_GAA  | GGGCGG    | UU GGGU | AG+ CCU   | GGUUA AGGG   | *G CAGGA | CU C+AU      | A A GGGG      | UCCAGUAGGGU    | C GAGG  | m1YUcm | m1I m1A | AUCCGG | UCCCGC  |
| R_HHU  | GGGCGG    | UU GGGU | AG+ CCU   | GGUUA AGGG   | *G CAGGA | CU UGA       | A A UCCG      | UCCAGUAGGGU    | C GAGG  | UUC    | A A     | AUCCGG | UCCCGC  |
| M1_CAU | AGGCGG    | UA GGGU | AG+ CCA   | GGUUA UCCG   | G CCGCG  | CU CAU       | A A CCGG      | AGAU           | C AGAG  | UUC    | A A     | AUCCGG | CUCUCG  |
| M2_CAU | GGGCGG    | UU GGGU | AG+ CCU   | GGUUA AGGG   | *G CUCGG | CU GAA       | hn6A A CCGG   | AGGU           | C GGGG  | m1YUcm | m1I A   | AUCCGG | CCGCGG  |
| N_CAU  | GGGCGG    | UU GGGU | AG+ CCU   | GGUUA AGGG   | *G CUCGG | CU GAA       | hn6A A CCGG   | AGGU           | C GAGG  | UUC    | G A     | AUCCGG | AGGAGG  |
| R_HHU  | GGGCGG    | UU GGGU | AG+ CCU   | GGUUA AGGG   | *G CUCGG | CU GAA       | hn6A A CCGG   | AGGU           | C GAGG  | m1YUcm | G m1A   | AUCCGG | UCCCGC  |
| R_HHU  | GGGCGG    | UU GGGU | AG+ CCU   | GGUUA AGGG   | *G CUCGG | CU GAA       | hn6A A CCGG   | AGGU           | C GAGG  | UUC    | A A     | AUCCGG | UCCCGC  |
| R_HHU  | GGGCGG    | UU GGGU | AG+ CCU   | GGUUA AGGG   | *G CUCGG | CU GAA       | hn6A A CCGG   | AGGU           | C GAGG  | UUC    | A A     | AUCCGG | UCCCGC  |
| R_HHU  | GGGCGG    | UU GGGU | AG+ CCU   | GGUUA AGGG   | *G CUCGG | CU GAA       | hn6A A CCGG   | AGGU           | C GAGG  | UUC    | A A     | AUCCGG | UCCCGC  |
| 1      | 8         | 1       | 1         | 2            | 2        | 3            | 3             | 4              | 4       | 5      | 6       | 6      |         |
| .....  | UR G..Y   | AG      |           | GG R ..Y     | R ..G.   | CU           | A ..C..       | 4              | C ..G.. | UUC    | R m1A   | RYD..  | .....   |

*Pyrococcus furiosus*

| AA AC  | Acc-5'             | D-5'    | D-loop    | D-3'         | AC-5'     | Ac-loop    | AC-3'               | V-region     | E-5'     | T-loop      | E-3'    | Acc-3'  |        |
|--------|--------------------|---------|-----------|--------------|-----------|------------|---------------------|--------------|----------|-------------|---------|---------|--------|
| 1      | 8                  | 1       | 1         | 2            | 2         | 3          | 3                   | 4            | 4        | 5           | 6       | 6       |        |
| 1      | 0                  | 4       | 4         | 2            | 2         | 2          | 3                   | 4            | 4        | 4           | 6       | 6       |        |
| L_UAG  | GGGGGG             | UU GGGG | AG+ CCU   | GGUCAA AGGC  | *Gm CGGGA | U cmm5UAG  | G G UCCCG           | UCCCGUAGGGGU | C GGGG   | UUC         | A A     | AUCCGG  | CCCCCG |
| L_CAG  | GGGGGG             | UU GGGG | AG+ CCU   | GGUCAA AGGC  | *Gm CGGGA | U CAG      | G G UCCCG           | UCCCGUAGGGGU | C GGGG   | UUC         | A A     | AUCCGG  | CCCCCG |
| P_HSG  | GGGGGG             | UU GGGG | AG+ CCU   | GGUCAA AGGC  | *Gm CGGGA | U CAG      | G G UCCCG           | UCCCGUAGGGGU | C GGGG   | UUC         | A A     | AUCCGG  | CCCCCG |
| Q_UUG  | AGCCCGG            | UU GGGU | AG+ C     | GmGCCAA GCAU | G CCGGA   | CU cmm5UAG | A A UCCG            | UCCAGUAGGGU  | C GGGG   | UUC         | A A     | AUCCGG  | CCCCCG |
| Q_UUG  | AGCCCGG            | UU GGGU | AG+ C     | GmGCCAA GCAU | G CCGGA   | CU cmm5UAG | A A UCCG            | UCCAGUAGGGU  | C GGGG   | UUC         | A A     | AUCCGG  | CCCCCG |
| R_GCC  | GGGGGG             | UU GGGU | AG+ CCU   | GGUUA AGGG   | m2G CCGG  | CU GCG     | m1mG A CUCUG        | AGGU         | C GGGG   | UUC         | A A     | AUCCGG  | CCCCCG |
| A_HGC  | GGG*Cs2GmUA        | UU GGGU | AG+ CCU   | GGUUA AGGG   | Gm CCGCC  | CU cmm5UCC | A A GGGG            | AGGC         | C GGGG   | m5UUCm      | m1I m1A | AUCCGG  | CGGGG  |
| A_HGC  | GGGCGG             | UA GGGU | AG+ CCU   | GGUUA AGGG   | G CCGCC   | CU GGC     | A A GGGG            | AGGC         | C GGGG   | UUC         | A A     | AUCCGG  | CGGGG  |
| D_GUC  | GGGCGG             | UU GGGU | AG+ CCC   | GGUUA AGGG   | m2G CCGG  | CU GGC     | A A UCCG            | CGA          | C CCGG   | UUC         | A A     | AUCCGG  | CGGGG  |
| E_UCC  | m7GCC*+GGUG2_7GmUA | UU GGGU | AG+ CCC   | GGUUA AGGG   | m2G CCGG  | CU CUC     | m1G A UCCG          | CGA          | m5C CCGG | UUC         | A A     | AUCCGG  | CGGGG  |
| G_GCC  | GGGCGG             | UU GGGU | AG+ CCU   | GGUUA AGGG   | G CCGCC   | CU CCC     | A A GGGG            | CGA          | m5C CCGG | UUC         | A A     | AUCCGG  | CGGGG  |
| V_UAC  | GGGCGG             | UU GGGU | AG+ CCU   | GGUUA AGGG   | m2G CCGG  | CU cmm5UCC | m1G A GCGG          | CGA          | C CCGG   | UUC         | A A     | AUCCGG  | CGGGG  |
| G_GCC  | GGGCGG             | UU GGGU | AG+ CCU   | GGUUA AGGG   | G CCGCC   | CU GGC     | A A GGGG            | AGGC         | C GGGG   | UUC         | A A     | AUCCGG  | CGGGG  |
| V_UAC  | GGGCGG             | UU GGGU | AG+ CCU   | GGUUA AGGG   | G CCGCC   | CU UAC     | A A GGGG            | AGGU         | C GGGG   | UUC         | G m1A   | AUCCGG  | CGGGG  |
| V_GAC  | GGGCGG             | UU GGGU | AG+ CCU   | GGUUA AGGG   | *G CCGCC  | CU GAC     | A A GGGG            | AGGU         | C GGGG   | UUC         | A A     | AUCCGG  | CGGGG  |
| C_GCA  | GGG*Cs2GmUA        | Um1AGGU | AG+ A     | GGC C AGGC   | *Gm GGGGA | CU GCA     | G A UCCG            | UUUA         | C GGGG   | m5s2UUCm    | m1I m1A | AUCCGG  | UCCCGG |
| F_GAA  | GGGCGG             | UU GGGU | AG+ CCU   | GGUUA AGGG   | A CCGGA   | CU GAA     | m1mG A A UCCG       | UUGU         | C GGGG   | UUC         | A A     | AUCCGG  | CGGGG  |
| L_UAG  | GGGCGG             | UU GGGU | AG+ CCU   | GGUUA AGGG   | *Gm CGGGA | CU UAA     | G UCCG              | UCCAGUAGGGU  | C GGGG   | UUC         | G A     | AUCCGG  | CCCCCG |
| S_GGA  | GGGCGG             | UU GGGU | AG+ CCA   | GGUUA AGGG   | *Gm CGGGA | CU UGA     | img-2/m1mG A CCGG   | UCCCGUAGGGU  | C GGGG   | m5U/m5s2UUC | A A     | AUCCGG  | UCCCGG |
| S_GGA  | GGGCGG             | UU GGGU | AG+ CCA   | GGUUA AGGG   | G CCGG    | CU GGA     | m1mG A G/a2_2G UCCG | UCCCGUAGGGU  | C GGGG   | UUC         | A A     | AUCCGG  | UCCCGG |
| M_CAA  | GGGCGG             | UU GGGU | AG+ CCU   | GGUUA AGGG   | C CCGG    | CU CCA     | m1mG A C CCGG       | GGA          | m5C GGGG | UUCm        | m1I m1A | AUCCGG  | CCCCCG |
| I_GAU  | GGGCGG             | UU GGGU | AG+ Cs2CU | GGUUA AGGG   | Gm CCGCC  | CU GAA     | hn6A A CCGG         | AGGU         | C GGGG   | UUC         | G A     | AG CCGG | CGGGG  |
| K_CAU  | GGGCGG             | UU GGGU | AG+ CCU   | GGUUA AGGG   | *Gm CCGGA | CU CAU     | ms2t6A A UCCG       | AGGU         | C GGGG   | m5UUCm      | m1I m1A | AUCCGG  | CGGGG  |
| M1_CAU | AGGCGG             | UA GGGU | AG+ CUA   | GGUUA AGGG   | *Gm CCGGA | CU CAU     | A A CCGG            | AGGU         | C CCGG   | m5s2UUCm    | m1I m1A | AUCCGG  | CGGGG  |
| M2_CAU | GGGCGG             | UU GGGU | AG+ CCU   | GGUUA AGGG   | G C CCGG  | CU CAU     | hn6A A CCGG         | AGGU         | C CCGG   | m5s2UUCm    | G m1A   | AG CCGG | CGGGG  |
| R_HHU  | GGGCGG             | UU GGGU | AG+ CCA   | GGUUA AGGG   | *Gm CCGG  | CU CCU     | t6A A CCGG          | AGGU         | C GGGG   | UUC         | A A     | AUCCGG  | CGGGG  |
| R_HHU  | GGGCGG             | UU GGGU | AG+ CCA   | GGUUA AGGG   | G CCGG    | CU cmm5UUC | A A CCGG            | AGGU         | C GGGG   | UUC         | G m1A   | AUCCGG  | CGGGG  |
| S_GGU  | GGGCGG             | UU GGGU | AG+ CCU   | GGUUA AGGG   | *Gm CCGG  | CU GCU     | t6A A CCGG          | AGGU         | C GGGG   | UUC         | A A     | AUCCGG  | CGGGG  |
| T_GGU  | GGGCGG             | UU GGGU | AG+ CCU   | GGUUA AGGG   | *Gm GGGGA | CU cmm5UUC | hn6A A UCCG         | AGGU         | C GGGG   | UUC         | A A     | AUCCGG  | CGGGG  |
| T_GGU  | GGGCGG             | UU GGGU | AG+ CCU   | GGUUA AGGG   | *Gm CCGG  | CU GGU     | t6A/hn6A A CCGG     | AGGU         | C CCGG   | UUCm        | m1I m1A | AG CCGG | CGGGG  |
| 1      | 8                  | 1       | 1         | 2            | 2         | 3          | 3                   | 4            | 4        | 5           | 6       | 6       |        |
| .....  | UR G..Y            | AG      |           | GG R ..Y     | R ..G.    | CU         | R R ..C..           | 4            | C ..G..  | UUC         | R m1A   | AY C..  | .....  |

*Sulfolobus acidocaldarius*

| AA AC | Acc-5'  | D-5'    | D-loop  | D-3'         | AC-5'    | Ac-loop | AC-3'      | V-region    | E-5'   | T-loop | E-3' | Acc-3' |        |
|-------|---------|---------|---------|--------------|----------|---------|------------|-------------|--------|--------|------|--------|--------|
| 1     | 8       | 1       | 1       | 2            | 2        | 3       | 3          | 4           | 4      | 5      | 6    | 6      |        |
| 1     | 0       | 4       | 4       | 2            | 2        | 2       | 3          | 4           | 4      | 4      | 6    | 6      |        |
| L_GAG | GGGGGG  | UU GGGG | AG+ CCU | GGUCAA AGGC  | *G CCGGA | CU GAG  | m1G C UCCG | UCCCGUAGGGU | C GGGG | UUC    | A A  | AUCCGG | CCCCCG |
| L_CAG | GGGGGG  | UU GGGG | AG+ CCU | GGUCAA AGGC  | *G CCGGA | CU GAG  | m1G C UCCG | UCCCGUAGGGU | C GGGG | UUC    | A A  | AUCCGG | CCCCCG |
| L_CAG | GGGGGG  | UU GGGG | AG+ CCU | GGUCAA AGGC  | *G CCGGA | CU GAG  | m1G C UCCG | UCCCGUAGGGU | C GGGG | UUC    | A A  | AUCCGG | CCCCCG |
| E_UUG | GGGGGG  | UU GGGU | AG+ CCU | GGUCAA AGGC  | *G CCGGA | CU GAG  | m1G C UCCG | UCCCGUAGGGU | C GGGG | UUC    | A A  | AUCCGG | CCCCCG |
| Q_UUG | AGCCCGG | UU GGGU | AG+ C   | GmGCCAA GCAU | G CCGGA  | CU GAG  | m1G C UCCG | UCCCGUAGGGU | C GGGG | UUC    | A A  | AUCCGG | CCCCCG |
| A_GGC | GGGCGG  | UA GGGU | AG+ CCU | GGUUA AGGG   | *G CCGG  | CU GGC  | A U CCGG   | AGGU        | C CCGG | UUC    | A A  | AUCCGG | CGGGG  |
| A_UUC | GGGCGG  | UA GGGU | AG+ CCU | GGUUA AGGG   | *G CCGG  | CU GGC  | A U CCGG   | AGGU        | C CCGG | UUC    | A A  | AUCCGG | CGGGG  |
| L_GCC | GGGCGG  | UU GGGU | AG+ CCU | GGUUA AGGG   | *G CCGG  | CU GGC  | A U CCGG   | AGGU        | C CCGG | UUC    | A A  | AUCCGG | CGGGG  |
| V_GAG | GGGCGG  | UU GGGU | AG+ CCU | GGUUA AGGG   | *G CCGG  | CU GGC  | A U CCGG   | AGGU        | C CCGG | UUC    | A A  | AUCCGG | CGGGG  |
| D_GUC | GGGCGG  | UU GGGU | AG+ CCU | GGUUA AGGG   | *G CCGG  | CU GGC  | A U CCGG   | AGGU        | C CCGG | UUC    | A A  | AUCCGG | CGGGG  |
| E_UUC | GGGCGG  | UU GGGU | AG+ CCU | GGUUA AGGG   | *G CCGG  | CU GGC  | A U CCGG   | AGGU        | C CCGG | UUC    | A A  | AUCCGG | CGGGG  |
| E_UUC | GGGCGG  | UU GGGU | AG+ CCU | GGUUA AGGG   | *G CCGG  | CU GGC  | A U CCGG   | AGGU        | C CCGG | UUC    | A A  | AUCCGG | CGGGG  |
| F_GAA | GGGCGG  | UA GGGU | AG+ CCC | GGUUA AGGG   | *G CCGG  | CU GGC  | A U CCGG   | AGGU        | C CCGG | UUC    | A A  | AUCCGG | CGGGG  |
| L_UAA | GGGCGG  | UU GGGU | AG+ CCU | GGUUA AGGG   | *G CCGG  | CU GGC  | A U CCGG   | AGGU        | C CCGG | UUC    | A A  | AUCCGG | CGGGG  |
| L_CAA | GGGCGG  | UU GGGU | AG+ CCU | GGUUA AGGG   | *G CCGG  | CU GGC  | A U CCGG   | AGGU        | C CCGG | UUC    | A A  | AUCCGG | CGGGG  |
| S_GGA | GGGCGG  | UU GGGU | AG+ CCA | GGUUA AGGG   | *G CCGG  | CU GGC  | A U CCGG   | AGGU        | C CCGG | UUC    | A A  | AUCCGG | CGGGG  |
| S_GGA | GGGCGG  | UU GGGU | AG+ CCA | GGUUA AGGG   | *G CCGG  | CU GGC  | A U CCGG   | AGGU        | C CCGG | UUC    | A A  | AUCCGG | CGGGG  |
| V_GUA | GGGCGG  | UU GGGU | AG+ CCU | GGUUA AGGG   | *G CCGG  | CU GGC  | A U CCGG   | AGGU        | C CCGG | UUC    | A A  | AUCCGG | CGGGG  |
| M_CAA | GGGCGG  | UU GGGU | AG+ CCU | GGUUA AGGG   | *G CCGG  | CU GGC  | A U CCGG   | AGGU        | C CCGG | UUC    | A A  | AUCCGG | CGGGG  |
| N_GUU | GGGCGG  | UU GGGU | AG+ CCU | GGUUA AGGG   | *G CCGG  | CU GGC  | A U CCGG   | AGGU        | C C    |        |      |        |        |

## Figure S10

Structural alignments of the purified and analyzed tRNAs from each species. The secondary structural elements of the tRNA cloverleaf are indicated above and below each alignment with key positions numbered following the standard nomenclature of yeast tRNA-Phe. On the last line, highly conserved residues are indicated. For clarity, the base-paired stems are colored (yellow for the AA-stem; green for the D-stem; cyan for the AC-stem; purple for the TΨC-stem throughout the alignments). For the long-arm tRNAs, tRNA-Ser and tRNA-Leu, the possible pairings of the additional helix are in italics. The highly conserved residues are in bold and those quasi-conserved not bolded in the consensus lines below each alignment. Square brackets are used when there is a potential ambiguity in nomenclature. The amino acids are arranged alphabetically with at the top (in blue) those coded by CG-rich codons (1st group: C1-quadrant corresponding to G36-containing tRNAs – Figure 2); 2nd group: G1-quadrant corresponding to C36-containing tRNAs) and below (in red) those coded by UA-rich codons (1st group: U1-quadrant corresponding to A36-containing tRNAs; 2nd group: A1-quadrant corresponding to U36-containing tRNAs - Figure 2). The code for modified nucleosides follows the one in MODOMICS (Boccaletto et al. 2018). Thus, the modification is always indicated in front of the letter with the atom number of the base modified (m5C, s2U, m1G or m5s2U etc.). The exception is 2'O-methylation on the ribose indicated after the base without atom number (Gm, Cm, ...). Because, we cannot always assign the methylation position, we underline such residues (for example, Gm means the nucleotide could be either m1G, m2G... or Gm). Brackets are used when there is a mixture of modifications, e.g. [A/Am] means some of those As are methylated on the O2' and [A/Am] means that the methylation position of the A is unknown. For shortness, we introduced here: ac6A = \*A; ac4C = \*C; m22G = \*G. An "x" before a nucleotide, e.g. xG, or after a modification symbol, e.g. m<sup>x</sup>, means that the modification has not been formally identified (see text). Pseudouridines are not represented, except when the available evidence points formally to their presence, as for position 54 (the code MODOMICS is "Y").

## Figure S11

Drawings of tertiary pairs discussed in the text. A: the *trans* Watson-Crick/Watson-Crick G15/C48 (from PDB 1EHZ). B: the *trans* Watson-Crick/Hoogsteen T54/m1A58 (from PDB 1EHZ). C: the C32/A38N contact (from PDB 1EHZ). D: the G26/A44 base pair (from PDB 1EHZ). Bottom right: the *trans* Watson-Crick/Hoogsteen A54/m1A58 (from PDB 1YFG) seen from the top (above) and along the m22G26 (below). Drawings made using Pymol (PyMOL(TM) 1.7.7.6 – Incentive Product Copyright © Schrodinger LLC.

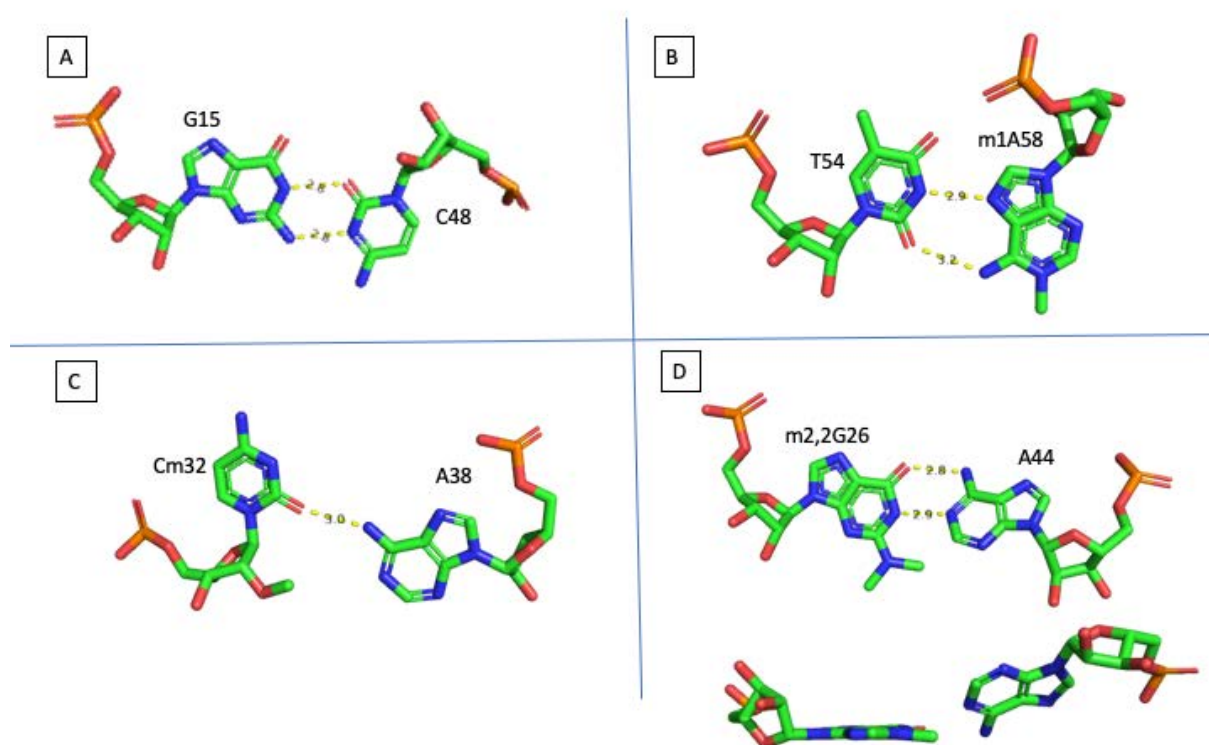

## Figure S12

Contacts between the P-site tRNA and the large rRNA in bacterial ribosome (A and B) (from Watson et al. 2020). The contacts occur in the minor groove of base pairs 29-41 and 30-40 in the anticodon stem. Notice how the hydroxyl groups of 40 and 41 are forming H-bonds locking in those residues. Further A1338 forms a *trans* Hoogsteen/Watson-Crick pair (a “sheared” base pair) with G944. C: The environment around residues 59 and 60 (from PDB 2DU3). D: The H-bond between O2'(A37) and N1(A1913) (from Watson et al. 2020). Drawings made using Pymol (PyMOL(TM) 1.7.7.6 – Incentive Product Copyright © Schrodinger LLC.

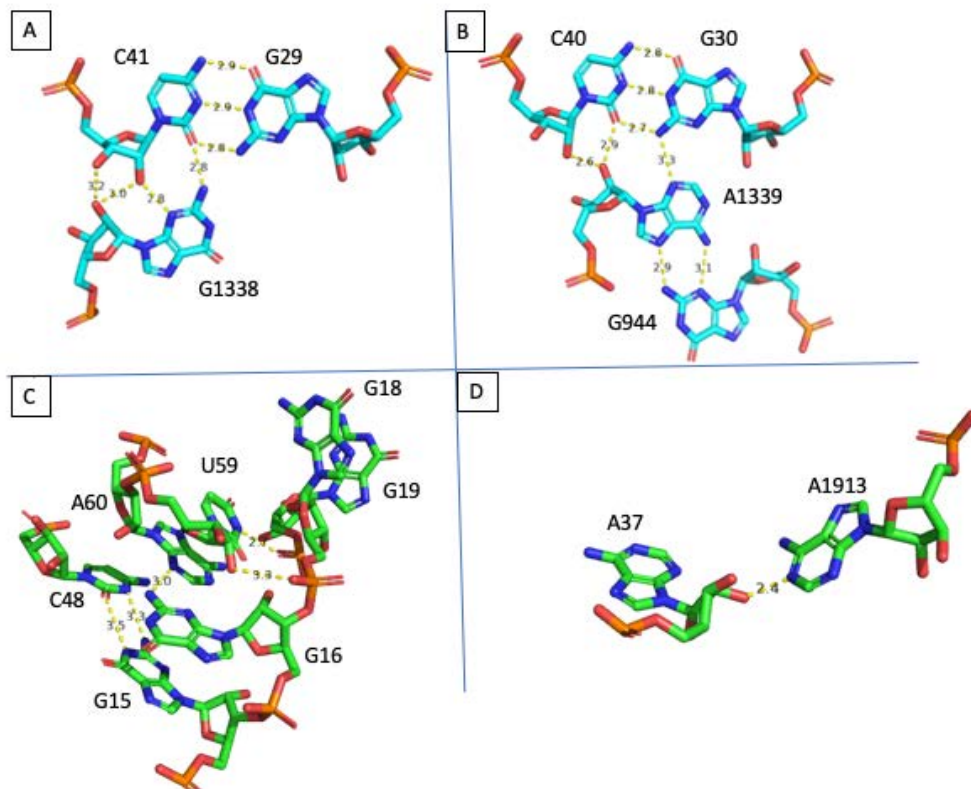

**Table S1**

Oligonucleotide fragments found in RNase digests that contain a methylation. In the case of RNase T1, m2G and m22G could be cleaved (depending tRNA as well as on experimental conditions) but m7G, m1G and Gm was never cleaved. In the case of RNase A, m5C and m1Y are cleaved and Cm, Um, m5U and m5s2U are not cleaved.

| m/z                      | z | Molecular mass (Da) | Sequence                 | tRNA     | Modification | T1 cleavage |
|--------------------------|---|---------------------|--------------------------|----------|--------------|-------------|
| <i>M. maripaludis</i>    |   |                     |                          |          |              |             |
| 719,13                   | 2 | 1439,3              | A[Gm]AGp + NA + K        | Ala UGC  | [Gm] 22      | no          |
| 1070,47                  | 3 | 3213,4              | CCCU[mnm5U]UC[m1G]AG>p   | Glu UUC  | [m1G] 37     | no          |
| 1135,7                   | 2 | 2272,4              | GmAUCCUGp                | Pro UGG  | [m1G] 37     | no          |
| 1440,64                  | 2 | 2882,3              | GmAUCCUGp                | His GUG  | [m1G] 37     | no          |
| 1154,21                  | 2 | 2309,4              | AAC[m2,2G]CUGp           | Phe GAA  | [m2,2G] 26   | no          |
| 667,11                   | 2 | 1335,2              | AAC[m2,2G]>p             | Tyr GUA  | [m2,2G] 26   | no          |
| 824,62                   | 2 | 1650,2              | C[m2,2G]CCGp             | Ser UGA  | [m2,2G] 26   | no          |
| 827,64                   | 2 | 1656,3              | C[m2,2G]ACG>p            | Asn GUU  | [m2,2G] 26   | no          |
| 968,62                   | 2 | 1938,2              | C[m2,2G]CCUG>p           | Lys UUU  | [m2,2G] 26   | no          |
| 968,67                   | 2 | 1938,3              | C[m2,2G]CCUG>p           | Thr GGU  | [m2,2G] 26   | no          |
| 977,61                   | 2 | 1956,2              | C[m2,2G]CCUGp            | Lys UUU  | [m2,2G] 26   | no          |
| 978,17                   | 2 | 1957,3              | U[m2,2G]CUCGp            | Ile      | [m2,2G] 26   | no          |
| 980,68                   | 2 | 1962,4              | C[m2,2G]UACG>p           | Ser GGA  | [m2,2G] 26   | no          |
| 1001,62                  | 2 | 2004,2              | AU[m2,2G]CAGp            | Leu UAG  | [m2,2G] 26   | no          |
| <i>P. furiosus</i>       |   |                     |                          |          |              |             |
| 856,14                   | 2 | 1713,3              | [m2,2G]AU[Am]Gp          | Cys GCA  | [m2,2G] 6    | no          |
| 684,1                    | 2 | 1369,2              | C[ac4C][m2,2G]Gp         | Ala UGC  | [m2,2G] 6    | no          |
| 679,13                   | 2 | 1359,3              | C[m2,2Gm]CGp             | Leu CAG  | [m2,2Gm] 26  | no          |
| 822,61                   | 2 | 1646,2              | C[m2,2Gm]CCG>p           | Ala UGC  | [m2,2G] 26   | no          |
| 824,64                   | 2 | 1650,3              | C[m2,2G]CCGp             | Leu CAG  | [m2,2G] 26   | no          |
| 857,65                   | 2 | 1716,3              | AC[ac4C][m2,2G]Gp        | Arg CCU  | [m2,2G] 26   | no          |
| 834,64                   | 2 | 1670,3              | C[m2,2Gm]CCGp            | Ala UGC  | [m2,2G] 26   | no          |
| 729,13                   | 2 | 1459,3              | A[mimG]A[m2,2G]p         | Ser GGA  | [m2,2G] 39   | yes         |
| 843,64                   | 2 | 1688,3              | A[m5C][m5C][Gm]Gp        | Gln CUG  | [Gm] 50      | no          |
| 1039,15                  | 1 | 1039,1              | [m2,7Gm]UG>p             | Glu CUC  | [m2,7Gm] 10  | no          |
| 1209,66                  | 2 | 2420,3              | p[m7G]CCC[ac4C][m2,2G]>p | Glu CUC  | [m7G] 10     | no          |
| <i>S. acidocaldarius</i> |   |                     |                          |          |              |             |
| 1291,5                   | 2 | 3876,5              | UC[m2G]UCUAG+C[Cm]UG>p   | Val GAC  | [m2G] 10     | no          |
| 1134,17                  | 2 | 2269,3              | CCCAU[Am][m2G]p          | Trp CCA  | [m2G] 10     | yes         |
| 1100,48                  | 2 | 3303,4              | UAm[m22G]UCUAG+CG>p      | Asp GUC  | [m22G] 10    | no          |
| 1328,69                  | 2 | 2658,4              | UCUAG+C[Gm]Gp            | Gln UUG  | [Gm] 18      | no          |
| 1432,89                  | 2 | 4300,7              | UA[m22G]UAUAG+CCC[Gm]Gp  | Glu UUC  | [Gm] 19      | no          |
| 1154,16                  | 2 | 2309,3              | GmAUCmCAGp               | Gln UUG  | [Gm] 23      | no          |
| 670,6                    | 2 | 1342,2              | [m2,2G][Cm]UG>p          | Ser UGA  | [m2,2G] 26   | no          |
| 672,6                    | 2 | 1346,2              | U[m2,2G]CGp              | Ala GGC  | [m2,2G] 26   | no          |
| 816,61                   | 2 | 1634,2              | C[m2,2G]UUGp             | Thr GGU  | [m2,2G] 26   | no          |
| 1142,13                  | 2 | 2285,3              | AC[m2,2G]CCUGp           | Gly GCC  | [m2,2G] 26   | no          |
| 1154,17                  | 2 | 2309,3              | AU[m2,2G]CCAGp           | Pro UGG  | [m2,2G] 26   | no          |
| 984,15                   | 2 | 1969,3              | Cm[m2,2G]CCCGp           | Phe TRUE | [m2,2G] 26   | no          |
| 987,64                   | 2 | 1976,2              | ACm[m2,2G]CUG>p          | Val GAC  | [m2,2G] 26   | no          |
| 832,13                   | 2 | 1665,3              | U[m2,2Gm]CCGp            | Trp CCA  | [m2,2Gm] 26  | no          |
| 984,13                   | 2 | 1969,3              | C[m2,2Gm]CCCGp           | Tyr GUA  | [m2,2Gm] 26  | no          |
| 820,61                   | 2 | 1642,2              | AC[m1G]CG>p              | Val GAC  | [m1G] 37     | no          |
| 1123,12                  | 2 | 2247,2              | [m1G]CCCCUGp             | Gln UUG  | [m1G] 37     | no          |
| 961,63                   | 2 | 1924,3              | [m1G]CCCCUG>p            | Pro UGG  | [m1G] 37     | no          |
| 961,63                   | 2 | 1924,3              | [m1G]CUCCG>p             | Leu GAG  | [m1G] 37     | no          |
| 975,64                   | 2 | 1952,3              | CCmU[m2,2G]CG>p          | Leu UAA  | [m2,2G] 47   | no          |
| 1162,78                  | 3 | 3490,3              | UUAUCCCU[m2,2G]CG>p      | Ser UGA  | [m2,2G] 47   | no          |

| m/z                      | z | Molecular mass (Da) | sequence              | tRNA    | Modification | RNase A cleavage |
|--------------------------|---|---------------------|-----------------------|---------|--------------|------------------|
| <i>M. maripaludis</i>    |   |                     |                       |         |              |                  |
| 821,10                   | 2 | 1643,2              | GGG[Cm]U>p            | Phe GAA | [Cm]32       | no               |
| 1030,64                  | 2 | 2062,3              | GGGGG[m1Y]p           | Arg UCU | [m1Y]54      | yes              |
| 1030,61                  | 2 | 2062,2              | GGGGG[m1Y]p           | Ser UGA | [m1Y]54      | yes              |
| 819,63                   | 2 | 1640,3              | [Cm][m1I][m1A]AU>p    | Ser UGA | [Cm]56       | no               |
| 820,12                   | 2 | 1641,2              | [Cm]G[m1A]AU>p        | Ile GAU | [Cm]56       | no               |
| <i>P. furiosus</i>       |   |                     |                       |         |              |                  |
| 691,13                   | 1 | 691,1               | [m2,2G][m5C]>p        | Met CAU | [m5C] 27     | yes              |
| 1030,16                  | 2 | 2061,3              | [Cm]AU[m6t6A]AC>p     | Met CAU | [Cm]32       | no               |
| 1014,16                  | 2 | 2029,3              | GGAGA[m5C]p           | Gly GCC | [m5C]48      | yes              |
| 846,60                   | 2 | 1694,2              | GGG[m5U]Up            | Cys GCA | [m5U]54      | no               |
| 1019,12                  | 2 | 2039,2              | GGGG[m5U]Up           | Met CAU | [m5U]54      | no               |
| 828,63                   | 2 | 1658,3              | [Cm][m1I][m1A]Up      | Gly GCC | [Cm]56       | no               |
| 1000,66                  | 2 | 2002,3              | [Cm][m1I][m1A]AGCp    | Thr GGU | [Cm]56       | no               |
| 1001,16                  | 2 | 2003,3              | [Cm]G[m1A]AGCp        | Met CAU | [Cm]56       | no               |
| 854,64                   | 2 | 1710,3              | A[mimG]A[Cm]Cp        | Trp CCA | [Cm]39       | no               |
| 1016,18                  | 2 | 2033,3              | [Cm][Gm]GGAC[m5C]p    | Trp CCA | [Cm]41       | no               |
| 1016,18                  | 2 | 2033,3              | [Cm][Gm]GGAC[m5C]p    | Trp CCA | [m5C]48      | yes              |
| 1014,13                  | 2 | 2029,3              | GGAGA[m5C]p           | Gly GCC | [m5C]48      | yes              |
| 897,46                   | 2 | 2694,4              | AGGAG[Um][Gm]Cp       | Ini     | [Um] 21      | no               |
| 1011,12                  | 2 | 2023,2              | GAGG[m5s2U]Up         | Ini     | [m5s2U]54    | no               |
| <i>S. acidocaldarius</i> |   |                     |                       |         |              |                  |
| 819,62                   | 2 | 1640,2              | [Cm]O[Am]AU>p         | Met CAU | [Cm]56       | no               |
| 827,09                   | 2 | 1655,2              | [Um]GG[s2U]Up         | Met CAU | [Um] 51      | no               |
| 828,62                   | 2 | 1658,2              | [Cm]O[Am]AUp          | Gly GCC | [Cm]56       | no               |
| 830,12                   | 2 | 1661,2              | GGG[Cm]Up             | Leu GAG | [Cm]32       | no               |
| 836,62                   | 2 | 1674,2              | [Cm][m1I][Am]GUp      | Tyr GUA | [Cm]32       | no               |
| 836,63                   | 2 | 1674,3              | [Cm]AG[m1G]Cp         | Leu CAG | [Cm]34       | no               |
| 844,62                   | 2 | 1690,2              | G[Cm]GG[m5C]p         | Asp GUC | [Cm]69       | no               |
| 844,62                   | 2 | 1690,2              | G[Cm]GG[m5C]p         | Asp GUC | [m5C]72      | yes              |
| 854,64                   | 2 | 1710,3              | A[mimG]A[Cm]Cp        | Trp CCA | [Cm]39       | no               |
| 999,11                   | 2 | 1999,2              | [Cm]GGGs2UUp          | Gly GCC | [Cm] 50      | no               |
| 999,62                   | 2 | 2000,2              | [Um]GGGs2UUp          | Val GAC | [Um] 50      | no               |
| 1006,13                  | 2 | 2013,3              | [Cm]GmGGs2UUp         | Asp GUC | [Cm]50       | no               |
| 1009,65                  | 2 | 2020,3              | A[Gm]GG[Cm]Up         | Met     | [Cm]32       | no               |
| 1066,12                  | 2 | 2133,2              | GG[Cm]G[xG]Up         | Gly GCC | [Cm]50       | no               |
| 1131,83                  | 3 | 3397,5              | GGGAGAG[Cm][m2,2G]Cp  | Phe GAA | [Cm]25       | no               |
| 1172,13                  | 2 | 2345,3              | G[Um]GGGs2UUp         | Leu GAG | [Um] 50      | no               |
| 1172,13                  | 2 | 2345,3              | G[Um]GGG[s2U]Up       | Leu CAG | [Um] 50      | no               |
| 1172,14                  | 2 | 2345,3              | G[Um]GGGs2UUp         | Ser UGA | [Um] 50      | no               |
| 1200,68                  | 2 | 2402,4              | AAGGG[m2,2G][m5C]p    | Ser UGA | [m5C]27      | yes              |
| 1247,18                  | 3 | 3743,5              | AGGA[Um][m2,2G]GGGGCp | Asp GUC | [Um] 25      | no               |

## Table S2

### **Types and positions of chemical modifications of nucleotides in naturally occurring tRNAs from selected Archaea and their corresponding modification enzymes.**

The compilation includes data from tRNAs purified from: two Methanococcales, i.e. the mesophile *Methanococcus maripaludis* (this work), and the hyperthermophile *Methanocaldococcus jannaschii* (Yu et al. 2019); three closely related hyperthermophiles from the Pyrococcale genus, i.e. *Pyrococcus furiosus* (this work), *Pyrococcus abyssi* and *Pyrococcus horikoshii* together with data of the unique tRNA-Trp from *Thermococcus kodakarensis* analyzed so far. They all belong to the Euryarchaeal subgroup of Archaea. The last group of tRNAs analyzed belongs to the Sulfolobales phylum of the Crenarchaeota subgroup: *Sulfolobus acidocaldarius* (this work), *Sulfolobus solfataricus* and *Sulfolobus tokadai*. When known, are also listed the conventional acronyms of corresponding enzymes, for which the specificity has been experimentally validated, the group of ortholog genes they belong to (COG) and eventually the precise genomic orf (when known) obtained from MODOMICS (<https://iimcb.genesilico.pl/modomics/>) or PubMed/Medline. The associated reference list corresponds to the selection of only one, often among many other valuable ones, that best describes the tRNA(s) or the modification enzyme(s). Some modifications are catalyzed by stand-alone enzymes while others, especially in hyperthermophilic archaea, result from more complexed enzymatic machinery guided by sRNA (aFlpA C/D box sRNP in the case of 2'-O-methylations and Cbf5 H/ACA sRNP in the case of isomerisation of U into pseudouridine). In bold are the new modifications, observed in the present study, and for which the corresponding enzymes are not yet known. When underlined [X- methylated], it means that the nucleotide X is monomethylated but we do not know yet whether it is on the base or on the 2'-O-ribose. xU, and xG correspond to yet undetermined chemical modifications of the base that do not appear to correspond to any modification identified so far. Together with all the modified nucleotides reported in this work, are also listed those not indicated in Table 1 and Figure 3 but that have been experimentally identified in independent works, the archaeal species, the gene coding for the corresponding enzyme with references are clearly mentioned. Numbering positions of nucleotides in tRNA are the conventional ones used in the tRNA data bank (<http://trnadb.bioinf.uni-leipzig.de>).

| MODOMICS of archaeal tRNA |                         |                                   | Methanococcales           |                        |                           |           |
|---------------------------|-------------------------|-----------------------------------|---------------------------|------------------------|---------------------------|-----------|
| Pos                       | MODS                    | ENZYME (COG)                      | Orf                       | Archaea genus          | References                | Pmid      |
| 6                         | m2G                     | TrmN/Trm14 (COG0116)              | MJ0438                    | <i>M. jannaschii</i>   | Menezes et al, 2011       | .21693558 |
| 7                         | <b>ac6A</b> (see text)  | <b>unknown</b>                    |                           | <i>M. maripaludis</i>  | <b>this work</b>          |           |
| 8                         | s4U                     | Thil (COG0301)                    | Mmp1354/Mj0931            | <i>M. maripal/jann</i> | Liu et al, 2012           | .22904325 |
| 10                        | m2G/m2,2G               | Trm-G10 (COG1041)                 | Mmp0149/Mj0710            | <i>M. maripal/jann</i> | Yu et al, 2019            | .30745370 |
| 15                        | G+                      | TgtA + (arcS) (COG1549)           | Mj0436 +(Mj1022)          | <i>M. Jannaschii</i>   | Bai et al, 2000           | .10862614 |
| 15                        | G+                      | TgtA + (arcS) (COG1549)           | Mmp0610+(Mj1595)          | <i>M. maripaludis</i>  | Phillips et al, 2012      | .22032275 |
| 17                        | <b>s2C</b>              | <b>unknown</b>                    |                           | <i>M. maripaludis</i>  | <b>this work</b>          |           |
| 22                        | <b>Gm</b>               | <b>unknown</b>                    |                           | <i>M. maripaludis</i>  | <b>this work</b>          |           |
| 26                        | m2G/m2,2G               | Trm1 (COG1867)                    | Mmp0228/Mj0946            | <i>M. maripal/jann</i> | Graham/Kramer, 2007       | .17673084 |
| 32                        | s2C                     | <i>TtcA-like</i> (COG0037)        | <i>Mmp1356/Mj1157</i>     | <i>M. maripal/jann</i> | Yu et al, 2019            | .30745370 |
| 32                        | Cm/Um (+34?)            | <i>FlpA +snoRNP</i> (COG1889)     | <i>Mmp0597/Mj0697</i>     | <i>M. maripal/jann</i> | Yu et al, 2019            | .30745370 |
| 33                        | <b>s2U</b>              | <b>unknown</b>                    |                           | <i>M. maripaludis</i>  | <b>this work</b>          |           |
| 34                        | C+                      | TiaS (COG1571)                    | Mmp0616/Mj1095            | <i>M. maripal/jann</i> | Yu et al, 2019            | .30745370 |
| 34                        | mcm5(s2)U               | <i>Elp3-like</i> (COG1243)        | <i>Mmp1577/Mj1136</i>     | <i>M. maripal/jann</i> | Huang et al, 2008         | .18755837 |
| 34                        | s2(mnm5)U               | Ncs6/Ctu1-like+( <b>unknown</b> ) | Mmp1356/Mj1157            | <i>M. maripal/jann</i> | Liu et al, 2014           | .24530533 |
| 34                        | se2(mnm5)U              | <i>ybbB-like /selU+(unknown)</i>  | <i>Mmp0899/Mj0053</i>     | <i>M. maripal/jann</i> | Su et al, 2012            | .22293502 |
| 34                        | s2(cnm5)U               | Ncs6 + ( <b>unknown</b> )         |                           | <i>M. maripal/jann</i> | Yu et al, 2019            | .30745370 |
| 34                        | Cm (+32?)               | <i>FlpA +snoRNP</i> (COG1889)     | <i>Mmp0597/Mj0697</i>     | <i>M. maripal/jann</i> | Singh et al, 2004         | .15347671 |
| 34                        | <b>xU(cnU)</b> see text | <b>unknown</b>                    |                           | <i>M. maripaludis</i>  | <b>this work</b>          |           |
| 37                        | t6A                     | Tsa2+TsaB/D/E                     | Mj0062 + Mj1130           | <i>M. Jannaschii</i>   | Wan et al, 2016           | .27302132 |
| 37                        |                         | (t6A complex)                     | Mj0594 + Mj0186           | <i>M. Jannaschii</i>   |                           |           |
| 37                        | t6A                     | Tsa2+TsaB/D/E                     | Mmp0186 + 0415            | <i>M. maripaludis</i>  | Thiaville et al, 2014     | .25629598 |
| 37                        |                         | (t6A complex)                     | Mmp0247 + 0897            | <i>M. maripaludis</i>  |                           |           |
| 37                        | ms2t6A                  | MtaB (+ t6A complex)              | Mmp0412/Mj0867            | <i>M. maripal/jann</i> | Yu et al, 2019            | .30745370 |
| 37                        | ms2hn6A                 | (MtaB) + hn6A complex             | <i>t6A-related enzyme</i> | <i>M. maripal/jann</i> | Reddy et al, 1992         | .1280806  |
| 37                        | m1G                     | Trm5b (COG2520)                   | Mmp0323/Mj0883            | <i>M. maripal/jann</i> | Go-Ito et al, 2008        | .18384044 |
| 37                        | imG-14                  | (Trm5b)+Taw1 (COC0731)            | Mmp1440/Mj0257            | <i>M. maripal/jann</i> | Yu et al, 2019            | .30745370 |
| 37                        | imG                     | (Trm5b+Taw1)+Taw3                 | Mmp0310/Mj1510            | <i>M. maripal/jann</i> | Yu et al, 2019            | .30745370 |
| 37                        | yW                      | (Trm5+Taw1)+Trm2(+Taw3)           | Mmp0560/Mj1557            | <i>M. maripal/jann</i> | Umitsu et al, 2009        | .19717466 |
| 37                        | mimG                    | Trm5b+Taw1+Trm5a+Taw3             |                           | <i>M. maripal/jann</i> | deCrecy-Lagard et al,2010 | .20382657 |
| 37                        | <b>xG</b> (see text)    | <i>wyosine metabolism</i>         |                           | <i>M. maripaludis</i>  | <b>this work</b>          |           |
| 37                        | <b>f6A</b> (see text)   | <b>unknown (or TrmM-like)</b>     |                           | <i>M. maripaludis</i>  | (Golovina et al, 2016)    | .26707202 |
| 39                        | <b>s2U</b>              | <b>unknown</b>                    |                           | <i>M. maripaludis</i>  | <b>this work</b>          |           |
| 48                        | m5C (+49)               | Trm4 (COG0144)                    | Mmp1126/Mj0026            | <i>M. maripal/jann</i> | Kuratani et al, 2010      | .20600111 |
| 54                        | Psi (+55)               | Pus10 (COG1258)                   | Mmp0924/Mj0041            | <i>M. maripal/jann</i> | Gurha & Gupta, 2008       | .18952823 |
| 54                        | m1Psi                   | (Pus10) >>TrmY(COG1901)           | Mmp0094/Mj1640            | <i>M. maripal/jann</i> | Chatterjee et al, 2012    | .22274953 |
| 54                        | s4(m1Psi)               | TtuA + (TtuB) (COG0037)           | Mj1478                    | <i>M. jannaschii</i>   | Shigi, 2014               | .24765101 |
| 55                        | Psi                     | <i>probably present</i> (Pus10)   |                           | <i>M. maripal/jann</i> | Fitzek et al, 2018        | .29349599 |
| 56                        | Cm                      | Trm56 (COG1303)                   | Mmp1425/Mj1385            | <i>M. maripal/jann</i> | Yu et al, 2019            | .30745370 |
| 57                        | (m1A) >> m1I            | (TrmI) >> + <b>unknown</b>        |                           | <i>H. volcanii</i>     | Grosjean et al, 1996      | .7501451  |
| 58                        | m1A                     | TrmI (COG2519)                    | Mmp1375/Mj0134            | <i>M. maripal/jann</i> | Graham & Kramer, 2007     | .17673084 |
| 67                        | m2G                     | <b>unknown</b>                    |                           | <i>M. jannaschii</i>   | Yu et al, 2019            | .30745370 |

| MODOMICS of archaeal tRNA |                          |                                   |               | Pyrococcales             |                            |           |
|---------------------------|--------------------------|-----------------------------------|---------------|--------------------------|----------------------------|-----------|
| Pos                       | MODS                     | ENZYME (COG)                      | Orf           | Archaea genus            | References                 | Pmid      |
| 1                         | <b>2H-m7G</b> (see text) | unknown                           |               | <i>P. furiosus</i>       | this work                  |           |
| 5                         | <b>ac4C</b>              | unknown                           |               | <i>P. furiosus</i>       | this work                  |           |
| 6                         | m2G/m22G                 | TrmN/Trm14 (COG0116)              | PF1002        | <i>P. furiosus</i>       | Fislage et al, 2012        | .22362751 |
|                           | Cm-6 / <b>Um-8</b>       | unknown/unknown                   |               | <i>T. kodak/furios</i>   | Hirata et al, 2019         | .31405913 |
| 8                         | s4U-8(+9)                | Thil (COG0301)                    | PF1288/TK0368 | <i>P. furios/kodak</i>   | Cavuzic & Liu, 2017        | .28287455 |
| 9                         | m1A/m1G                  | Trm10 (COG2419)                   | PF0678/TK1257 | <i>P. furios/kodak</i>   | Krihnamohan et al, 2019    | .30704107 |
| 10                        | m2G/m2,2G                | Trm-G10 (COG1041)                 | PF0400/TK0980 | <i>P. furios/kodak</i>   | Armengaud et al, 2004      | .15210688 |
| 10                        | <b>2H-m27Gm</b> (text)   | unknown                           |               | <i>P. furiosus</i>       | this work                  |           |
| 15                        | G+                       | TgtA + (arcS) (COG1549)           | PF0071/TK2156 | <i>P. furios/horik</i>   | Ishitani et al, 2002       | .12054814 |
| 17                        | s2C                      | unknown                           |               | <i>T. furios/kodak</i>   | Hirata et al, 2019         | .31405913 |
| 18                        | <b>Gm</b>                | <i>FlpA +sRNP (or TrmH-like?)</i> | PF0059        | <i>P. furiosus</i>       | this work                  |           |
|                           | <b>Um-21; Gm-22</b>      | unknown or <i>FlpA +sRNP</i>      |               | <i>T. kodak/furios</i>   | Hirata et al, 2019         | .31405913 |
| 26                        | m2G/m2,2G(m)             | Trm1(+unknown)(COG1867)           | PF1871/TK0970 | <i>P. furios/kodaka</i>  | Constantinesco et al,1998  | .9685492  |
| 32                        | s2C                      | <i>TtcA-like</i> (COG0037)        | PF0273/TK1821 | <i>P. furios/kodaka</i>  | Cavuzic & Liu, 2017        | .28287455 |
| 32                        | m5C(m)                   | unknown ( <i>+FlpA-snoRNA</i> )   |               | <i>T. kodakarensis</i>   | Hirata et al, 2019         | .31405913 |
| 34                        | C+                       | TiaS (COG1571)                    | PF1855/TK0553 | <i>P. furios/kodak</i>   | Ikeuchi et al, 2010        | .20139989 |
| 34                        | s2(mnm5)U                | Ncs6/Ctu1-like (+unknown)         | PF0273/TK1821 | <i>P. furios/kodak</i>   | Cavuzic and Liu, 2018      | .28287455 |
| 34                        | (s2)mnm5U                | Elp3-like (COG1243)               |               |                          |                            |           |
| 34                        | Cm/Um(+39)               | FlpA + Nop5 + snoRNA              | PF0059/TK0183 | <i>P. furios/kodak</i>   | Clouet-d'Orval et al, 2001 | .11713301 |
| 34                        | cnm5U                    | unknown                           |               | <i>Euryarchaeota</i>     | see Mandal et al, 2014     | .24344322 |
| 34                        | ac4C(m)                  | <i>TmcA-like(+FlpA)</i> (COG1444) | PF0504/TK0754 | <i>P. furios/kodak</i>   | (Bortolin et al, 2003)     | .14602911 |
| 37                        | t6A                      | Tsa2 (+TsaB/D/E)                  | PF0306/TK0948 | <i>P. furios/kodak</i>   | Perrochia et al, 2012      | .23258706 |
| 37                        | ms2(hn6A)                | <i>MtaB-like (+unknown)</i>       | PF1912/TK2064 | <i>P. furios/kodak</i>   | Reddy et al, 1992          | .1280806  |
| 37                        | m1G                      | Trm5b (COG2520)                   | PF1415/TK0497 | <i>P. furios/kodak</i>   | Wu et al, 2017             | .28911863 |
| 37                        | imG2                     | (Trm5a+Taw1) + Taw2               | PF0089/TK2223 | <i>P. furios/kodak</i>   | Urbonavicius et al, 2014   | .24837075 |
| 37                        | mimG                     | (Trm5b+Taw1+ 22) +Taw3            | PF2034/TK0175 | <i>P. furios/kodak</i>   | Perche-Letuvée et al,2012  | .23043105 |
| 37                        | yW-86                    | (Trm5b+Taw1) + Taw2               | PF0500/TK0071 | <i>P. furios/kodak</i>   | Umitsu et al, 2009         | .19717466 |
| 38                        | <b>Am</b>                | <i>probably FlpA + snoRNP</i>     |               | <i>P. furiosus</i>       | Singh al 2004              | .15347671 |
| 39                        | <b>m22G</b>              | unknown                           |               | <i>P. furiosus</i>       | this work                  |           |
| 39                        | Cm (+34)                 | FlpA-Nop5+snoRNP                  | PF0059/TK0183 | <i>P. furios/kodak</i>   | Bortolin et al, 2003       | .14602911 |
|                           | Cm-41/42,Gm-42           | <i>probably all FlpA + snoRNP</i> |               | <i>T. kodak/furios</i>   | Hirata et al, 2019         | .31405913 |
| 42                        | <b>ac4C</b>              | unknown                           |               | <i>P. furiosus</i>       | this work                  |           |
| 44                        | <b>Um</b>                | unknown                           |               | <i>P. furiosus</i>       | this work                  |           |
| 47                        | <b>xU</b> (see text)     | unknown                           |               | <i>P. furiosus</i>       | this work                  |           |
| 48                        | m5C +49 (+27)            | Trm4/ <b>unknow-27</b> (COG0144)  | PF1553/TK0360 | <i>P.furios/kodak</i>    | Auxilien et al, 2017       | .17470432 |
| 50                        | <b>Gm</b>                | unknown                           |               | <i>P. furiosus</i>       | this work                  |           |
| 54                        | s2(m5U)                  | TtuA (+TrmU54) (COG2265)          | PF1172/TK1116 | <i>P. furios/kodak</i>   | Rose et al, 2020           | .32459340 |
| 55                        | Psi (+54)                | Pus10 (COG1258)                   | PF1139/TK0903 | <i>P. furios/kodak</i>   | Gurha & Gupta, 2008        | .18952823 |
| 55                        | Psi                      | Cbf5 (+Gar1; no gRNA)             | PF1785/TK1509 | <i>P. furios/kodak</i>   | Müller et al, 2007         | .17704128 |
| 56                        | Cm                       | Trm56 ( <i>or FlpA +snoRNP</i> )  | PF0461/TK0060 | <i>P.furios/kodak</i>    | Renalier et al, 2005       | .15987815 |
| 57                        | m1A (+58)                | TrmI (COG2519)                    | PF1896/TK1328 | <i>P. furios/kodak</i>   | Roovers et al, 2004        | .14739239 |
| 57                        | (m1A) >> m1I             | (TrmI) >> + unknown               |               | <i>P. furiosus</i>       | Grosjean et al, 1999       | .9973619  |
| 63                        | ac4C (+64)               | unknown                           |               | <i>P. furiosus</i>       | this work                  |           |
|                           | m2G-67, <b>Gm-68</b>     | unknown-67/68                     |               | <i>T. kodak/P.furios</i> | Hirata et al, 2019         | .31405913 |
| 72                        | m5C                      | NSun6 (COG0144)                   | PF0169/TK2122 | <i>P. furios/kodak</i>   | Li et al, 2019             | .30541086 |

| MODOMICS of archaeal tRNA |                       |                                 |                    | Sulfolobales             |                           |           |
|---------------------------|-----------------------|---------------------------------|--------------------|--------------------------|---------------------------|-----------|
| Pos                       | MODS                  | ENZYME (COG)                    | Orf                | Archaea genus            | References                | Pmid      |
| 3                         | ac4C                  | unknown                         |                    | <i>S. acidocaldarius</i> | this work                 |           |
| 9                         | m1A                   | Trm10 (COG2419)                 | Saci_1677          | <i>S. acidocaldarius</i> | Kempnaers et al, 2010     | .20525789 |
| 10                        | m2G/m2,2G             | Trm-G10 (COG1041)               | Saci_1283          | <i>S. acidocaldarius</i> | Wagner et al, 2004        | .17150579 |
| 15                        | G+                    | TgtA+ArcS-like (COG0343)        | Saci0659+Saci0657  | <i>S. acidocaldarius</i> | Phillips et al, 2012      | .22032275 |
| 17                        | <u>C/A</u> methylated | unknown                         |                    | <i>S. acidocaldarius</i> | this work                 |           |
| 18                        | Gm (+34)              | FlpA+ Nop5 + snoRNP             | Saci_1346          | <i>S. acidocaldarius</i> | Omer et al, 2006          | .16861619 |
| 20                        | <u>A</u> methylated   | unknown                         |                    | <i>S. acidocaldarius</i> | this work                 |           |
| 23                        | Gm                    | probably FlpA+Nop5+snoRN        | Saci_1346          | <i>S. acidocaldarius</i> | this work                 |           |
| 25                        | Cm/Um                 | probably FlpA+Nop5+snoRN        | Saci_1346          | <i>S. acidocaldarius</i> | this work                 |           |
| 26                        | m2G/m2,2G(m)          | Trm1(+unknown)(COG1867)         | Saci_1343          | <i>S. acidocaldarius</i> | ≈ ubiquitous in Archaea   |           |
| 27                        | m5C                   | unknown                         |                    | <i>S. acidocaldarius</i> | this work                 |           |
| 29                        | Gm                    | unknown                         |                    | <i>S. acidocaldarius</i> | this work                 |           |
| 32                        | Cm                    | TrmJ (COG0565)                  | Saci_0621          | <i>S. acidocaldarius</i> | Somme et al, 2014         | .24951554 |
| 34                        | C+                    | TiaS (COG1571)                  | Saci_0732          | <i>S. acidocaldarius</i> | Mandal et al, 2010        | .20133752 |
| 34                        | Um/Cm (+18)           | FlpA-Nop5 + snoRNP              | Saci_1346          | <i>S. acidocaldarius</i> | Ziesche et al, 2004       | .15522081 |
| 34                        | s2U(m)                | <i>Ncs6/Ctu1-like</i> (COG0037) | <i>Saci_1570</i>   | <i>S. acidocaldarius</i> | Liu et al, 2016           | .27791189 |
| 34                        | mchm5Um               | <i>Elp3-like</i> (COG1243)      | <i>Saci_1044</i>   | <i>S. acidocaldarius</i> | this work                 |           |
| 37                        | t6A                   | TsaC+ (Tsc complex)             | Saci_1642+Saci0851 | <i>S. tokadai</i>        | Kuratani et al, 2011      | .21538543 |
| 37                        | m1G                   | Trm5c (COG2520)                 | Saci_0559          | <i>S. acidocaldarius</i> | Urbonavicius et al, 2016  | .27852927 |
| 37                        | imG-14                | (Trm5c) +Taw1 (COG0731)         | Scai_1331          | <i>S. acidocaldarius</i> | Urbonavicius et al, 2016  | .27852927 |
| 37                        | imG2                  | (Trm5c +Taw1) +Trm5a            | Scai_0030          | <i>S. acidocaldarius</i> | deCrecy-Lagard et al,2010 | .20382657 |
| 37                        | mimG                  | (Trm5c +Taw2) +Taw3             | Saci_1603          | <i>S. acidocaldarius</i> | McCloskey et al, 1987     | .27932585 |
| 39                        | Cm                    | probably FlpA+Nop5+snoRN        | <i>Saci_1346</i>   | <i>S. acidocaldarius</i> | see in <i>P. furiosus</i> |           |
| 40                        | m5C                   | probably Trm4 (like in HVO)     |                    | <i>S. acidocaldarius</i> | Grosjean et al, 2008      | .18844986 |
| 41                        | ac4C (+40)            | unknown                         |                    | <i>S. acidocaldarius</i> | this work                 |           |
| 47                        | <u>A</u> methylated   | unknown                         |                    | <i>S. acidocaldarius</i> | this work                 |           |
| 47                        | m2,2G                 | unknown                         |                    | <i>S. acidocaldarius</i> | this work                 |           |
| 47                        | xU (see text)         | unknown                         |                    | <i>S. acidocaldarius</i> | this work                 |           |
| 48                        | m5C (+49)             | Trm4 (COG0144)                  | Saci_0717          | <i>S. acidocaldarius</i> | almost in all Archaea     |           |
| 50                        | Um/Cm (+18)           | FlpA-Nop5+snoRNP                | Saci_1346          | <i>S. acidocaldarius</i> | Tang et al, 2005          | .15659164 |
| 51                        | Gm                    | FlpA-Nop5+snoRNP                |                    | <i>S. acidocaldarius</i> | Zago et al, 2005          | .15752202 |
| 54                        | Um?? > see text       | unknown                         |                    | <i>S. acidocaldarius</i> | Kuchino et al, 1982       | .6178978  |
| 54                        | s2U/s4Psi?            | TtuA+TtuB see text              | Saci_0378+Saci1570 | <i>S. acidocaldarius</i> | Rose et al, 2020          | .32459340 |
| 54                        | <u>mxsU/Psi</u> >text | unknown                         |                    | <i>S. acidocaldarius</i> | this work                 |           |
| 55                        | Psi                   | possibly Cbf5                   | Scai_0811          | <i>S. acidocaldarius</i> | Majumber et a, 2016       | .27539785 |
| 56                        | Cm                    | Trm56 (COG1303)                 | Saci_1040          | <i>S. acidocaldarius</i> | Renalier et al, 2005      | .15987815 |
| 57                        | (m1A) >> m1I          | (TrmI) + unknown                |                    | <i>S. acidocaldarius</i> | Yamaizumi et al, 1982     | .7183961  |
| 58                        | m1A                   | TrmI (COG2519)                  | Saci_0844          | <i>S. acidocaldarius</i> | Guelorget et al, 2011     | .22168821 |
| 62                        | <u>C</u> methylated   | unknown                         |                    | <i>S. acidocaldarius</i> | this work                 |           |
| 64                        | <u>U</u> methylated   | unknown                         |                    | <i>S. acidocaldarius</i> | this work                 |           |
| 69                        | <u>C</u> methylated   | unknown                         |                    | <i>S. acidocaldarius</i> | this work                 |           |
| 72                        | m5C                   | NSun6 (COG0144)                 | Saci_1487          | <i>S. acidocaldarius</i> | Wagner et al, 2004        | .17150579 |
| 72                        | <u>U</u> methylated   | unknown                         |                    | <i>S. acidocaldarius</i> | this work                 |           |
